# Supplementary material for: Evidence of the unprecedented conversion of intermolecular proton to water bridging of two phosphoryl ruthenium complexes
Source: Royal Society of Chemistry journal article supplement (doi:10.1039/c3nj00522d), 2013-01-01
Supplement: c3nj00522d.pdf [file c3nj00522d.pdf]

*NJC*

**Evidence of the unprecedented conversion of intermolecular  
proton- to water-bridging two phosphoryl ruthenium complexes**

Rémy Sylvain,<sup>a</sup> Laure Vendier,<sup>a</sup> Christian Bijani,<sup>a</sup> Antonio Santoro,<sup>b</sup> Fausto Punteriero,<sup>b</sup>  
Sebastiano Campagna,<sup>\*b</sup> Pierre Sutra<sup>a</sup> and Alain Igau<sup>\*a</sup>

**Supporting information**

## SUMMARY

|                                                                                                                                                                                 |    |
|---------------------------------------------------------------------------------------------------------------------------------------------------------------------------------|----|
| Experimental section : general information.....                                                                                                                                 | 3  |
| Synthesis of complex $[\{[\text{Ru}](\text{Ph}_2\text{P}=\text{O})\}_2\text{H}][\text{PF}_6]_3$ <b>2</b> ( $[\text{Ru}] = \text{Ru}(\text{tpy})(\text{bpy})$ ).....             | 5  |
| Synthesis of complex $[\{[\text{Ru}](\text{Ph}_2\text{P}=\text{O})\}_2(\text{H}_2\text{O})][\text{PF}_6]_2$ <b>3</b> ( $[\text{Ru}] = \text{Ru}(\text{tpy})(\text{bpy})$ )..... | 5  |
| Figure S1. Molecular structure of complex <b>2</b> .....                                                                                                                        | 6  |
| Table 1. Crystal data and structure refinement for complex <b>2</b> .....                                                                                                       | 6  |
| Table 2. Atomic coordinates and equivalent isotropic displacement parameters for complex <b>2</b> .....                                                                         | 7  |
| Table 3. Bond lengths [Å] and angles [deg] for complex <b>2</b> .....                                                                                                           | 9  |
| Table 4. Anisotropic displacement parameters ( $\text{Å}^2 \times 10^3$ ) for complex <b>2</b> .....                                                                            | 15 |
| Figure S2 : $^{31}\text{P}\{^1\text{H}\}$ NMR spectra of complex <b>2</b> in $\text{CD}_2\text{Cl}_2$ at 233K.....                                                              | 17 |
| Figure S3 : $^1\text{H}$ NMR spectra of complex <b>2</b> in $\text{CD}_2\text{Cl}_2$ at 298K.....                                                                               | 17 |
| Figure S4 : $^1\text{H}$ NMR spectra of complex <b>2</b> in $\text{CD}_2\text{Cl}_2$ at 233K. ....                                                                              | 18 |
| Figure S5. Molecular structure of complex <b>3</b> .....                                                                                                                        | 19 |
| Figure S6. Packing of the molecular structure of complex <b>3</b> viewed along the C axis.....                                                                                  | 19 |
| Table 5. Crystal data and structure refinement for complex <b>3</b> .....                                                                                                       | 20 |
| Table 6. Atomic coordinates and equivalent isotropic displacement parameters for complex <b>3</b> .....                                                                         | 21 |
| Table 7. Bond lengths [Å] and angles [deg] for complex <b>3</b> .....                                                                                                           | 22 |
| Table 8. Anisotropic displacement parameters ( $\text{Å}^2 \times 10^3$ ) for complex <b>3</b> .....                                                                            | 26 |
| Figure S7 : $^{31}\text{P}$ NMR spectra of complex <b>3</b> in $\text{CD}_3\text{CN}$ at 298K.....                                                                              | 28 |
| Figure S8 : $^1\text{H}$ NMR spectra of complex <b>3</b> in $\text{CD}_2\text{Cl}_2$ at 298K.....                                                                               | 28 |
| Figure S9 : $^1\text{H}$ NMR spectra of complex <b>3</b> in $\text{CD}_2\text{Cl}_2$ at 183K.....                                                                               | 29 |
| Figure S10 : $^1\text{H}\{^{31}\text{P}\}$ et $^1\text{H}$ NMR spectra of complex <b>3</b> in $\text{CD}_2\text{Cl}_2$ at 183K (17.0 ; 15.0ppm).....                            | 29 |
| Figure S11. Luminescence spectra of <b>1</b> in acetonitrile at 298 K and in butyronitrile at 77 K.....                                                                         | 30 |
| Table 9. Selected photophysical data of phosphoryl complexes <b>1</b> , <b>2</b> and <b>3</b> .                                                                                 |    |

## Experimental Section

### *General Information.*

All reactions were conducted under an inert atmosphere of dry argon using standard Schlenk-line techniques. Solvents were dried, distilled, and degassed following conventional methods prior to use. Elemental analyses were carried out with a PerkinElmer 2400 Series II CHNS/O Elemental Analyzer. NMR spectra were recorded on a Bruker DPX 300, AV 300, AV 400 and on a Bruker AV 500 spectrometer. All the  $^1\text{H}$  and  $^{13}\text{C}$  signals were assigned on the basis of chemical shifts, spin-spin coupling constants, splitting patterns, and signal intensities and by using 2D experiments as  $^1\text{H}$ - $^1\text{H}$  COSY45 and  $^1\text{H}$ - $^{13}\text{C}$  HMQC experiments. Infrared spectra were recorded by using universal ATR sampling technology on a Perkin-Elmer spectrum 100 FT-IR. Mass spectra were recorded on a TSQ7000 instrument from ThermoElectron.

Data of compound **2** were collected at low temperature (180 K) on a Gemini Agilent diffractometer using a graphite-monochromated Cu-K $\alpha$  Enhance radiation ( $\lambda = 1.54184 \text{ \AA}$ ) and equipped with an Oxford Instrument Cooler Device. Indeed, it was really difficult to synthesise high diffracting crystals. In order to enhance the weak diffraction signal, we chose to record data under copper radiation.

Data of compound **3** were collected at low temperature (100 K) on a Bruker Kappa Apex II diffractometer using a graphite-monochromated Mo-K $\alpha$  radiation ( $\lambda = 0.71073 \text{ \AA}$ ) and equipped with an Oxford Cryosystems Cryostream Cooler Device.

The final unit cell parameters have been obtained by means of a least-squares refinement. The structures have been solved by Direct Methods using SIR92,<sup>1</sup> and refined by means of least-squares procedures on a  $F^2$  with the aid of the program SHELXL97<sup>2</sup> include in the softwares package WinGX version 1.63.<sup>3</sup> The Atomic Scattering Factors were taken from International tables for X-Ray Crystallography.<sup>4</sup> All hydrogens atoms were geometrically placed and refined by using a riding model.

All non-hydrogens atoms were anisotropically refined, and in the last cycles of refinement a weighting scheme was used, where weights are calculated from the following formula:  $w=1/[\sigma^2(\text{Fo}^2)+(aP)^2+bP]$  where  $P=(\text{Fo}^2+2\text{Fc}^2)/3$ .

Drawing of molecule are performed with the program ORTEP32<sup>5</sup> with 30% probability displacement ellipsoids for non-hydrogen atoms.

The electrochemical measurements were obtained using an Autolab PGSTAT 100 potentiostat using tetrabutylammonium hexafluorophosphate as the supporting electrolyte in freshly distilled acetonitrile and a platinum working electrode.

Absorption spectra were recorded with a Jasco V-560 spectrophotometer. For steady-state luminescence measurements, a Jobin Yvon-Spex Fluoromax P spectrofluorimeter was used, equipped with a Hamamatsu R3896 photomultiplier. The spectra were corrected for photomultiplier response using a program purchased with the fluorimeter. For the luminescence lifetimes, an Edinburgh OB 900 time-correlated single-photon-counting spectrometer was used. As excitation sources, a Hamamatsu PLP 2 laser diode (59 ps pulse width at 408 nm) and/or the nitrogen discharge (pulse width 2 ns at 337 nm) were employed.

Electrospray mass spectrometry analyses were performed on a Perkin Elmer Sciex API-365 spectrometer in positive mode. Melting points were determined in capillaries using an Electrothermal melting point apparatus.

The  $^1\text{H}$  and  $^{13}\text{C}$  are numbered as shown below.

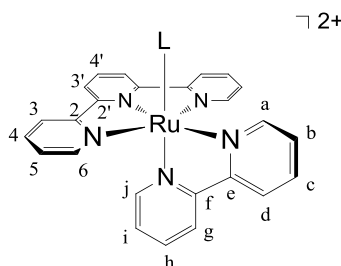

**{[Ru(tpy)(bpy)(Ph<sub>2</sub>PO)]<sub>2</sub>H}[PF<sub>6</sub>]<sub>3</sub> (2)** : To a solution of [Ru(tpy)(bpy)(Ph<sub>2</sub>PO)][PF<sub>6</sub>] **1** (0.100 g, 0.012 mmol) in 5 mL acetonitrile was added HCl (1 eq.) in Et<sub>2</sub>O and the mixture was stirred for 30 mn at room temperature. Addition of KPF<sub>6</sub> (1 eq.) was followed and the cloudy mixture was filtered to remove the KCl salts. A large volume of ether (50 mL) was then added to the filtrate which was slowly reduced by two-thirds to give the product **2** as a red crystalline powder in 80% (81 mg) isolated yield, m. p. 168°C (dec).

NMR  $^{31}\text{P}$  (121.5 MHz, CD<sub>2</sub>Cl<sub>2</sub>, 213K) :  $\delta$  (ppm) = 112.2 (s), -144.2 (PF<sub>6</sub>,  $^1J_{\text{PF}}=704.6$  Hz).

NMR  $^1\text{H}$  (500MHz, CD<sub>2</sub>Cl<sub>2</sub>, 298K) :  $\delta$  (ppm) = 9.75 (d, 2H<sub>a</sub>,  $^3J=5\text{Hz}$ ), 8.48 (d, 2H<sub>d</sub>,  $^3J=8\text{Hz}$ ), 8.31 (d, 2H<sub>g</sub>,  $^3J=8\text{Hz}$ ), 8.20 (t, 2H<sub>c</sub>,  $^3J=8\text{Hz}$ ), 8.08-7.67 (m, 4H<sub>3</sub>, 4H<sub>3'</sub>, 2H<sub>4'</sub>, 4H<sub>4</sub>, 2H<sub>h</sub>, 2H<sub>b</sub>), 7.55 (d, 4H<sub>6</sub>,  $^3J=5\text{Hz}$ ), 7.21-7.16 (m, 4H<sub>5</sub>, 4H<sub>para</sub>, Ph, 2H<sub>i</sub>), 6.94 (m, 8H<sub>meta</sub>, Ph + 2H<sub>j</sub>), 6.65 (dd, 8H<sub>ortho</sub>, Ph,  $^3J=7.7\text{Hz}$ ,  $^3J=8\text{Hz}$ ). NMR  $^1\text{H}$  (500MHz, CD<sub>2</sub>Cl<sub>2</sub>, 213K) :  $\delta$  (ppm) = 10.06 (broad, H<sup>+</sup>), 9.75 (2H<sub>a</sub>), all the other signals are identicals to those observed at 298K.

NMR  $^{13}\text{C}\{^1\text{H}\}$  (75 MHz, CD<sub>2</sub>Cl<sub>2</sub>, 213K) :  $\delta$  (ppm) = 156.1 (C<sub>a</sub>), 153.4 (C<sub>6</sub>), 148.2 (C<sub>j</sub>), 138.9 (C<sub>h</sub>), 138.0 (C<sub>c</sub>), 136.2 (C<sub>4'</sub>), 133.1 (C<sub>ipso</sub>, Ph), 130.4 (C<sub>para</sub>, Ph), 128.9 (C<sub>ortho</sub>, Ph), 128.6 (C<sub>meta</sub>, Ph), 128.4 (C<sub>4</sub>), 128.2 (C<sub>5</sub>), 127.8 (C<sub>b</sub>), 127.5 (C<sub>i</sub>), 124.3 (C<sub>3</sub>), 124.3 (C<sub>d</sub>), 123.6 (C<sub>g</sub>), 123.4 (C<sub>3'</sub>), the ipso carbon atoms in the tpy (C<sub>2</sub> and C<sub>2'</sub>) and bpy (C<sub>e</sub> and C<sub>f</sub>) ligands have not been observed.

Mass (ES<sup>+</sup>) : m/z = 692.1 [(2M-H<sup>+</sup>-3PF<sub>6</sub>)].

**{[Ru(tpy)(bpy)(Ph<sub>2</sub>PO)]<sub>2</sub>H<sub>2</sub>O}[PF<sub>6</sub>]<sub>2</sub> (3)** : In an acetonitrile solution (2 mL) of **2** (100 mg, 1.2 10<sup>-4</sup> mol) was added water in excess followed by KPF<sub>6</sub> (0.221 mg, 1.2 10<sup>-3</sup> mol). The reaction mixture was then stirred for 30 min. Complex **3** was isolated after filtration, washing with 3\*10 mL of water then 3\*10 mL of ether. The volatiles were evaporated and the product was isolated as a red solid in 91% (93 mg) yield, m. p. 142°C (dec).

RMN  $^{31}\text{P}$  (121.5 MHz, CD<sub>2</sub>Cl<sub>2</sub>, 298K) :  $\delta$  (ppm) = 95.3 (s), -144.4 (PF<sub>6</sub>,  $^1J_{\text{PF}}=704.6$  Hz).

RMN  $^1\text{H}$  (300MHz, CD<sub>2</sub>Cl<sub>2</sub>, 298K) :  $\delta$  (ppm) = 10.05 (d, 2H<sub>a</sub>,  $^3J=5\text{Hz}$ ), 8.47 (d, 2H<sub>d</sub>,  $^3J=10\text{Hz}$ ), 8.30 (d, 2H<sub>g</sub>,  $^3J=10\text{Hz}$ ), 8.21 (t, 2H<sub>c</sub>,  $^3J=5\text{Hz}$ ), 8.10-8.01 (m, 4H<sub>3</sub>, 4H<sub>3'</sub>), 7.91 (t, 2H<sub>4'</sub>,  $^3J=5\text{Hz}$ ), 7.86 (t, 2H<sub>h</sub>,  $^3J=5\text{Hz}$ ), 7.60 (d, 4H<sub>6</sub>,  $^3J=5\text{Hz}$ ), 7.53 (t, 2H<sub>b</sub>,  $^3J=5\text{Hz}$ ), 7.28 (t, 4H<sub>5</sub>,  $^3J=10\text{Hz}$ ), 7.20 (t, 4H<sub>4</sub>,  $^3J=5\text{Hz}$ ), 7.16 (d, 2H<sub>j</sub>,  $^3J=5\text{Hz}$ ), 7.01-6.95 (m, 18H, H<sub>i</sub>+<sub>meta</sub>, <sub>ortho</sub>, Ph), 6.69 (t, 4H<sub>para</sub>, Ph,  $^3J=10\text{Hz}$ ).

NMR  $^1\text{H}$  (500MHz, CD<sub>2</sub>Cl<sub>2</sub>, 183K) :  $\delta$  (ppm) = 16.17 (t broad, H<sub>2</sub>O).

RMN  $^{13}\text{C}\{^1\text{H}\}\{^{31}\text{P}\}$  (75 MHz, CD<sub>2</sub>Cl<sub>2</sub>, 298K) :  $\delta$  (ppm) = 156.1 (C<sub>a</sub>), 153.0 (C<sub>6</sub>), 148.0 (C<sub>j</sub>), 138.4 (C<sub>h</sub>), 137.8 (C<sub>c</sub>), 137.7 (C<sub>4'</sub>), 135.4 (C<sub>ipso</sub>, Ph), 129.8 (C<sub>4</sub>), 128.8 (C<sub>para</sub>, Ph), 128.7 (C<sub>ortho</sub>, Ph), 128.3 (C<sub>meta</sub>, Ph), 127.9 (C<sub>b</sub>), 127.2 (C<sub>i</sub>), 127.1 (C<sub>i</sub>), 123.9 (C<sub>3</sub>), 123.7 (C<sub>d</sub>), 123.2 (C<sub>g</sub>), 123.0 (C<sub>3'</sub>), the ipso carbon atoms in the tpy (C<sub>2</sub> and C<sub>2'</sub>) and bpy (C<sub>e</sub> and C<sub>f</sub>) ligands have not been observed.

Mass (ES<sup>+</sup>) : m/z = 692 ([2M-H<sub>2</sub>O-2PF<sub>6</sub>]).

Elemental analysis Calcd. for: C<sub>74</sub>H<sub>60</sub>F<sub>12</sub>N<sub>10</sub>O<sub>3</sub>P<sub>4</sub>Ru<sub>2</sub> (1692,17): C, 52.55; H, 3.58; N, 8.28. Found: C, 52.74; H, 3.79; N, 8.07.

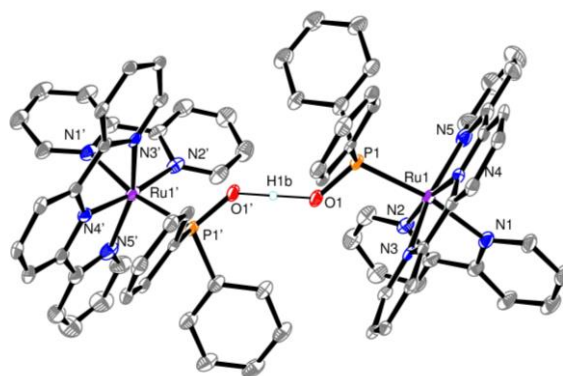

Figure S1. Molecular structure of complex 2.

Table 1. Crystal data and structure refinement for complex 2.

|                                   |                                                                                                                     |                                                               |
|-----------------------------------|---------------------------------------------------------------------------------------------------------------------|---------------------------------------------------------------|
| Identification code               | remy240112                                                                                                          |                                                               |
| Empirical formula                 | C <sub>74</sub> H <sub>59</sub> N <sub>10</sub> O <sub>2</sub> P <sub>2</sub> Ru <sub>2</sub> , 3(F <sub>6</sub> P) |                                                               |
| Formula weight                    | 1819.30                                                                                                             |                                                               |
| Temperature                       | 180 (2) K                                                                                                           |                                                               |
| Wavelength                        | 1.54180 Å                                                                                                           |                                                               |
| Crystal system, space group       | Monoclinic, C 1 2/c 1                                                                                               |                                                               |
| Unit cell dimensions              | a = 17.2568 (6) Å<br>b = 29.2556 (13) Å<br>c = 15.1819 (5) Å                                                        | alpha = 90 deg.<br>beta = 100.457 (3) deg.<br>gamma = 90 deg. |
| Volume                            | 7537.4 (5) Å <sup>3</sup>                                                                                           |                                                               |
| Z, Calculated density             | 4, 1.603 Mg/m <sup>3</sup>                                                                                          |                                                               |
| Absorption coefficient            | 5.115 mm <sup>-1</sup>                                                                                              |                                                               |
| F(000)                            | 3656                                                                                                                |                                                               |
| Crystal size                      | 0.15 x 0.06 x 0.03 mm                                                                                               |                                                               |
| Theta range for data collection   | 3.88 to 60.82 deg.                                                                                                  |                                                               |
| Limiting indices                  | -19<=h<=19, -32<=k<=29, -15<=l<=17                                                                                  |                                                               |
| Reflections collected / unique    | 16962 / 5658 [R(int) = 0.0402]                                                                                      |                                                               |
| Completeness to theta = 60.82     | 98.4 %                                                                                                              |                                                               |
| Absorption correction             | Semi-empirical from equivalents                                                                                     |                                                               |
| Max. and min. transmission        | 0.8657 and 0.5714                                                                                                   |                                                               |
| Refinement method                 | Full-matrix least-squares on F <sup>2</sup>                                                                         |                                                               |
| Data / restraints / parameters    | 5658 / 0 / 513                                                                                                      |                                                               |
| Goodness-of-fit on F <sup>2</sup> | 1.051                                                                                                               |                                                               |
| Final R indices [I>2sigma(I)]     | R1 = 0.0681, wR2 = 0.1900                                                                                           |                                                               |
| R indices (all data)              | R1 = 0.0866, wR2 = 0.2074                                                                                           |                                                               |
| Largest diff. peak and hole       | 1.559 and -0.986 e.Å <sup>-3</sup>                                                                                  |                                                               |

Table 2. Atomic coordinates and equivalent isotropic displacement parameters for complex 2.

U(eq) is defined as one third of the trace of the orthogonalized U<sub>ij</sub> tensor.

|       | x        | y         | z         | U (eq) |
|-------|----------|-----------|-----------|--------|
| C(11) | 898 (4)  | 779 (3)   | 100 (4)   | 31 (2) |
| C(12) | 516 (4)  | 449 (3)   | -477 (5)  | 33 (2) |
| C(13) | 823 (4)  | 15 (3)    | -451 (4)  | 30 (2) |
| C(14) | 1519 (4) | -81 (3)   | 126 (4)   | 31 (2) |
| C(15) | 1888 (4) | 263 (3)   | 675 (4)   | 30 (2) |
| C(16) | 2657 (4) | 203 (3)   | 1290 (5)  | 32 (2) |
| C(17) | 3100 (4) | -192 (3)  | 1431 (5)  | 42 (2) |
| C(18) | 3790 (4) | -186 (3)  | 2057 (5)  | 44 (2) |
| C(19) | 4029 (4) | 211 (3)   | 2502 (5)  | 47 (2) |
| C(20) | 3585 (4) | 603 (3)   | 2329 (5)  | 39 (2) |
| C(21) | 3756 (5) | 1061 (3)  | 2718 (6)  | 47 (2) |
| C(22) | 4448 (5) | 1170 (4)  | 3314 (6)  | 61 (3) |
| C(23) | 4572 (6) | 1611 (5)  | 3610 (8)  | 83 (4) |
| C(24) | 4015 (7) | 1937 (4)  | 3320 (7)  | 73 (3) |
| C(25) | 3325 (6) | 1815 (3)  | 2737 (6)  | 58 (2) |
| C(1)  | 3309 (5) | 1225 (3)  | 148 (6)   | 47 (2) |
| C(2)  | 3522 (5) | 1386 (4)  | -630 (6)  | 56 (2) |
| C(3)  | 3082 (6) | 1719 (3)  | -1112 (6) | 61 (3) |
| C(4)  | 2439 (6) | 1901 (3)  | -800 (6)  | 52 (2) |
| C(5)  | 2255 (5) | 1738 (3)  | -3 (5)    | 41 (2) |
| C(6)  | 1619 (5) | 1917 (3)  | 411 (5)   | 40 (2) |
| C(7)  | 1114 (6) | 2264 (3)  | 39 (6)    | 53 (2) |
| C(8)  | 546 (6)  | 2424 (3)  | 481 (7)   | 59 (2) |
| C(9)  | 487 (6)  | 2243 (3)  | 1300 (6)  | 57 (2) |
| C(10) | 987 (6)  | 1896 (3)  | 1636 (6)  | 52 (2) |
| C(26) | 1662 (5) | 1115 (3)  | 3737 (5)  | 39 (2) |
| C(27) | 1014 (5) | 1227 (3)  | 4136 (5)  | 41 (2) |
| C(28) | 1139 (6) | 1376 (3)  | 5024 (6)  | 53 (2) |
| C(29) | 1892 (6) | 1406 (3)  | 5515 (6)  | 56 (2) |
| C(30) | 2530 (6) | 1306 (3)  | 5128 (6)  | 51 (2) |
| C(31) | 2414 (5) | 1161 (3)  | 4242 (5)  | 44 (2) |
| C(32) | 1648 (4) | 271 (3)   | 2833 (4)  | 29 (2) |
| C(33) | 2330 (4) | 100 (3)   | 3375 (5)  | 34 (2) |
| C(34) | 2454 (4) | -365 (3)  | 3486 (5)  | 38 (2) |
| C(35) | 1899 (5) | -672 (3)  | 3074 (5)  | 41 (2) |
| C(36) | 1212 (4) | -513 (3)  | 2537 (5)  | 36 (2) |
| C(37) | 1096 (4) | -48 (3)   | 2411 (4)  | 31 (2) |
| N(3)  | 1574 (3) | 690 (2)   | 673 (4)   | 29 (1) |
| N(4)  | 2897 (3) | 591 (2)   | 1734 (4)  | 34 (1) |
| N(5)  | 3190 (4) | 1385 (2)  | 2441 (4)  | 46 (2) |
| N(1)  | 2689 (4) | 1401 (2)  | 454 (4)   | 42 (2) |
| N(2)  | 1545 (4) | 1718 (2)  | 1207 (4)  | 39 (2) |
| F(13) | 4543 (3) | 337 (2)   | 575 (3)   | 61 (1) |
| F(14) | 5180 (3) | -345 (2)  | 827 (3)   | 63 (2) |
| F(15) | 4193 (3) | -262 (2)  | -370 (3)  | 63 (2) |
| P(1)  | 1495 (1) | 876 (1)   | 2595 (1)  | 31 (1) |
| P(2)  | 0        | 1835 (1)  | 7500      | 97 (2) |
| P(3)  | 4686 (3) | -1586 (2) | 2169 (4)  | 69 (2) |
| P(4)  | 5000     | 0         | 0         | 51 (1) |

|        |           |           |           |          |
|--------|-----------|-----------|-----------|----------|
| Ru (1) | 2226 (1)  | 1137 (1)  | 1557 (1)  | 33 (1)   |
| F (1)  | 145 (5)   | 1457 (3)  | 8239 (4)  | 110 (3)  |
| F (2A) | 423 (8)   | 2275 (4)  | 7974 (8)  | 95 (2)   |
| F (3A) | 969 (8)   | 1690 (4)  | 7460 (8)  | 95 (2)   |
| F (3B) | -233 (11) | 2080 (6)  | 8498 (11) | 95 (2)   |
| F (2B) | 759 (11)  | 1995 (6)  | 7772 (11) | 95 (2)   |
| F (7)  | 5111 (10) | -1146 (5) | 2226 (17) | 166 (8)  |
| F (9)  | 5065 (15) | -1647 (5) | 1612 (18) | 470 (20) |
| F (8)  | 3945 (12) | -1302 (5) | 2172 (14) | 298 (12) |
| F (10) | 4376 (10) | -1979 (6) | 2406 (19) | 166 (8)  |
| O (1)  | 601 (3)   | 926 (2)   | 2200 (3)  | 34 (1)   |

---



Table 3. Bond lengths [Å] and angles [deg] for complex **2**.

---

|             |           |
|-------------|-----------|
| C(11)-N(3)  | 1.348(9)  |
| C(11)-C(12) | 1.388(10) |
| C(11)-H(11) | 0.9500    |
| C(12)-C(13) | 1.373(10) |
| C(12)-H(12) | 0.9500    |
| C(13)-C(14) | 1.381(10) |
| C(13)-H(13) | 0.9500    |
| C(14)-C(15) | 1.385(10) |
| C(14)-H(14) | 0.9500    |
| C(15)-N(3)  | 1.359(9)  |
| C(15)-C(16) | 1.489(10) |
| C(16)-N(4)  | 1.347(9)  |
| C(16)-C(17) | 1.381(11) |
| C(17)-C(18) | 1.382(11) |
| C(17)-H(17) | 0.9500    |
| C(18)-C(19) | 1.368(12) |
| C(18)-H(18) | 0.9500    |
| C(19)-C(20) | 1.381(12) |
| C(19)-H(19) | 0.9500    |
| C(20)-N(4)  | 1.355(9)  |
| C(20)-C(21) | 1.472(12) |
| C(21)-N(5)  | 1.370(11) |
| C(21)-C(22) | 1.398(12) |
| C(22)-C(23) | 1.368(15) |
| C(22)-H(22) | 0.9500    |
| C(23)-C(24) | 1.369(17) |
| C(23)-H(23) | 0.9500    |
| C(24)-C(25) | 1.396(14) |
| C(24)-H(24) | 0.9500    |
| C(25)-N(5)  | 1.344(11) |
| C(25)-H(25) | 0.9500    |
| C(1)-N(1)   | 1.344(11) |
| C(1)-C(2)   | 1.382(12) |
| C(1)-H(1)   | 0.9500    |
| C(2)-C(3)   | 1.363(14) |
| C(2)-H(2)   | 0.9500    |
| C(3)-C(4)   | 1.389(14) |
| C(3)-H(3)   | 0.9500    |
| C(4)-C(5)   | 1.391(11) |
| C(4)-H(4)   | 0.9500    |
| C(5)-N(1)   | 1.352(11) |
| C(5)-C(6)   | 1.457(11) |
| C(6)-N(2)   | 1.368(10) |
| C(6)-C(7)   | 1.390(12) |
| C(7)-C(8)   | 1.367(13) |
| C(7)-H(7)   | 0.9500    |
| C(8)-C(9)   | 1.373(13) |
| C(8)-H(8)   | 0.9500    |
| C(9)-C(10)  | 1.371(13) |
| C(9)-H(9)   | 0.9500    |
| C(10)-N(2)  | 1.361(11) |
| C(10)-H(10) | 0.9500    |
| C(26)-C(31) | 1.389(12) |
| C(26)-C(27) | 1.405(11) |
| C(26)-P(1)  | 1.842(8)  |
| C(27)-C(28) | 1.397(11) |
| C(27)-H(27) | 0.9500    |

|                       |             |
|-----------------------|-------------|
| C (28) -C (29)        | 1.378 (13)  |
| C (28) -H (28)        | 0.9500      |
| C (29) -C (30)        | 1.370 (13)  |
| C (29) -H (29)        | 0.9500      |
| C (30) -C (31)        | 1.389 (11)  |
| C (30) -H (30)        | 0.9500      |
| C (31) -H (31)        | 0.9500      |
| C (32) -C (33)        | 1.400 (10)  |
| C (32) -C (37)        | 1.402 (10)  |
| C (32) -P (1)         | 1.817 (8)   |
| C (33) -C (34)        | 1.382 (11)  |
| C (33) -H (33)        | 0.9500      |
| C (34) -C (35)        | 1.379 (11)  |
| C (34) -H (34)        | 0.9500      |
| C (35) -C (36)        | 1.392 (11)  |
| C (35) -H (35)        | 0.9500      |
| C (36) -C (37)        | 1.381 (11)  |
| C (36) -H (36)        | 0.9500      |
| C (37) -H (37)        | 0.9500      |
| N (3) -Ru (1)         | 2.057 (6)   |
| N (4) -Ru (1)         | 1.963 (6)   |
| N (5) -Ru (1)         | 2.069 (7)   |
| N (1) -Ru (1)         | 2.126 (6)   |
| N (2) -Ru (1)         | 2.079 (7)   |
| F (13) -P (4)         | 1.614 (5)   |
| F (14) -P (4)         | 1.598 (5)   |
| F (15) -P (4)         | 1.599 (5)   |
| P (1) -O (1)          | 1.559 (5)   |
| P (1) -Ru (1)         | 2.3186 (18) |
| P (2) -F (2B)         | 1.381 (18)  |
| P (2) -F (2B) #1      | 1.381 (18)  |
| P (2) -F (1) #1       | 1.563 (8)   |
| P (2) -F (1)          | 1.563 (8)   |
| P (2) -F (2A) #1      | 1.587 (12)  |
| P (2) -F (2A)         | 1.587 (12)  |
| P (2) -F (3A) #1      | 1.736 (13)  |
| P (2) -F (3A)         | 1.736 (13)  |
| P (2) -F (3B) #1      | 1.787 (17)  |
| P (2) -F (3B)         | 1.787 (17)  |
| P (3) -F (9)          | 1.173 (9)   |
| P (3) -P (3) #2       | 1.337 (12)  |
| P (3) -F (10)         | 1.342 (16)  |
| P (3) -F (7)          | 1.477 (19)  |
| P (3) -F (8)          | 1.526 (14)  |
| P (3) -F (7) #2       | 1.583 (15)  |
| P (3) -F (9) #2       | 1.83 (3)    |
| P (3) -F (10) #2      | 1.99 (2)    |
| P (4) -F (14) #3      | 1.598 (5)   |
| P (4) -F (15) #3      | 1.599 (5)   |
| P (4) -F (13) #3      | 1.614 (5)   |
| F (7) -F (7) #2       | 0.98 (4)    |
| F (7) -P (3) #2       | 1.583 (15)  |
| F (7) -F (9)          | 1.73 (3)    |
| F (7) -F (8) #2       | 1.78 (3)    |
| F (9) -P (3) #2       | 1.83 (3)    |
| F (8) -F (7) #2       | 1.78 (3)    |
| F (10) -P (3) #2      | 1.99 (2)    |
| O (1) -H (1B)         | 1.218 (16)  |
| N (3) -C (11) -C (12) | 121.9 (7)   |
| N (3) -C (11) -H (11) | 119.0       |

|                        |            |
|------------------------|------------|
| C (12) -C (11) -H (11) | 119.0      |
| C (13) -C (12) -C (11) | 119.2 (7)  |
| C (13) -C (12) -H (12) | 120.4      |
| C (11) -C (12) -H (12) | 120.4      |
| C (12) -C (13) -C (14) | 119.5 (7)  |
| C (12) -C (13) -H (13) | 120.2      |
| C (14) -C (13) -H (13) | 120.2      |
| C (13) -C (14) -C (15) | 119.1 (7)  |
| C (13) -C (14) -H (14) | 120.5      |
| C (15) -C (14) -H (14) | 120.5      |
| N (3) -C (15) -C (14)  | 121.7 (6)  |
| N (3) -C (15) -C (16)  | 114.8 (6)  |
| C (14) -C (15) -C (16) | 123.4 (7)  |
| N (4) -C (16) -C (17)  | 121.1 (7)  |
| N (4) -C (16) -C (15)  | 111.8 (6)  |
| C (17) -C (16) -C (15) | 127.1 (7)  |
| C (16) -C (17) -C (18) | 118.6 (8)  |
| C (16) -C (17) -H (17) | 120.7      |
| C (18) -C (17) -H (17) | 120.7      |
| C (19) -C (18) -C (17) | 119.7 (8)  |
| C (19) -C (18) -H (18) | 120.1      |
| C (17) -C (18) -H (18) | 120.1      |
| C (18) -C (19) -C (20) | 120.3 (8)  |
| C (18) -C (19) -H (19) | 119.8      |
| C (20) -C (19) -H (19) | 119.8      |
| N (4) -C (20) -C (19)  | 119.5 (8)  |
| N (4) -C (20) -C (21)  | 112.4 (7)  |
| C (19) -C (20) -C (21) | 128.1 (7)  |
| N (5) -C (21) -C (22)  | 121.3 (9)  |
| N (5) -C (21) -C (20)  | 115.1 (7)  |
| C (22) -C (21) -C (20) | 123.6 (9)  |
| C (23) -C (22) -C (21) | 119.4 (10) |
| C (23) -C (22) -H (22) | 120.3      |
| C (21) -C (22) -H (22) | 120.3      |
| C (22) -C (23) -C (24) | 119.5 (10) |
| C (22) -C (23) -H (23) | 120.2      |
| C (24) -C (23) -H (23) | 120.2      |
| C (23) -C (24) -C (25) | 119.6 (10) |
| C (23) -C (24) -H (24) | 120.2      |
| C (25) -C (24) -H (24) | 120.2      |
| N (5) -C (25) -C (24)  | 121.8 (10) |
| N (5) -C (25) -H (25)  | 119.1      |
| C (24) -C (25) -H (25) | 119.1      |
| N (1) -C (1) -C (2)    | 121.1 (9)  |
| N (1) -C (1) -H (1)    | 119.4      |
| C (2) -C (1) -H (1)    | 119.4      |
| C (3) -C (2) -C (1)    | 119.6 (9)  |
| C (3) -C (2) -H (2)    | 120.2      |
| C (1) -C (2) -H (2)    | 120.2      |
| C (2) -C (3) -C (4)    | 119.5 (8)  |
| C (2) -C (3) -H (3)    | 120.2      |
| C (4) -C (3) -H (3)    | 120.2      |
| C (3) -C (4) -C (5)    | 119.2 (9)  |
| C (3) -C (4) -H (4)    | 120.4      |
| C (5) -C (4) -H (4)    | 120.4      |
| N (1) -C (5) -C (4)    | 120.3 (8)  |
| N (1) -C (5) -C (6)    | 115.6 (7)  |
| C (4) -C (5) -C (6)    | 124.1 (8)  |
| N (2) -C (6) -C (7)    | 121.2 (7)  |
| N (2) -C (6) -C (5)    | 115.2 (7)  |
| C (7) -C (6) -C (5)    | 123.6 (7)  |

|                        |           |
|------------------------|-----------|
| C (8) -C (7) -C (6)    | 120.2 (8) |
| C (8) -C (7) -H (7)    | 119.9     |
| C (6) -C (7) -H (7)    | 119.9     |
| C (7) -C (8) -C (9)    | 119.4 (9) |
| C (7) -C (8) -H (8)    | 120.3     |
| C (9) -C (8) -H (8)    | 120.3     |
| C (10) -C (9) -C (8)   | 118.6 (9) |
| C (10) -C (9) -H (9)   | 120.7     |
| C (8) -C (9) -H (9)    | 120.7     |
| N (2) -C (10) -C (9)   | 123.9 (8) |
| N (2) -C (10) -H (10)  | 118.1     |
| C (9) -C (10) -H (10)  | 118.1     |
| C (31) -C (26) -C (27) | 118.4 (7) |
| C (31) -C (26) -P (1)  | 121.9 (6) |
| C (27) -C (26) -P (1)  | 119.6 (6) |
| C (28) -C (27) -C (26) | 119.6 (8) |
| C (28) -C (27) -H (27) | 120.2     |
| C (26) -C (27) -H (27) | 120.2     |
| C (29) -C (28) -C (27) | 120.5 (8) |
| C (29) -C (28) -H (28) | 119.8     |
| C (27) -C (28) -H (28) | 119.8     |
| C (30) -C (29) -C (28) | 120.5 (8) |
| C (30) -C (29) -H (29) | 119.8     |
| C (28) -C (29) -H (29) | 119.8     |
| C (29) -C (30) -C (31) | 119.6 (9) |
| C (29) -C (30) -H (30) | 120.2     |
| C (31) -C (30) -H (30) | 120.2     |
| C (26) -C (31) -C (30) | 121.4 (8) |
| C (26) -C (31) -H (31) | 119.3     |
| C (30) -C (31) -H (31) | 119.3     |
| C (33) -C (32) -C (37) | 117.4 (7) |
| C (33) -C (32) -P (1)  | 122.7 (6) |
| C (37) -C (32) -P (1)  | 119.7 (5) |
| C (34) -C (33) -C (32) | 121.1 (7) |
| C (34) -C (33) -H (33) | 119.4     |
| C (32) -C (33) -H (33) | 119.4     |
| C (35) -C (34) -C (33) | 120.5 (7) |
| C (35) -C (34) -H (34) | 119.8     |
| C (33) -C (34) -H (34) | 119.8     |
| C (34) -C (35) -C (36) | 119.6 (7) |
| C (34) -C (35) -H (35) | 120.2     |
| C (36) -C (35) -H (35) | 120.2     |
| C (37) -C (36) -C (35) | 119.9 (7) |
| C (37) -C (36) -H (36) | 120.1     |
| C (35) -C (36) -H (36) | 120.1     |
| C (36) -C (37) -C (32) | 121.4 (7) |
| C (36) -C (37) -H (37) | 119.3     |
| C (32) -C (37) -H (37) | 119.3     |
| C (11) -N (3) -C (15)  | 118.5 (6) |
| C (11) -N (3) -Ru (1)  | 127.1 (5) |
| C (15) -N (3) -Ru (1)  | 114.3 (4) |
| C (16) -N (4) -C (20)  | 120.6 (7) |
| C (16) -N (4) -Ru (1)  | 119.9 (5) |
| C (20) -N (4) -Ru (1)  | 119.5 (5) |
| C (25) -N (5) -C (21)  | 118.3 (8) |
| C (25) -N (5) -Ru (1)  | 128.0 (7) |
| C (21) -N (5) -Ru (1)  | 113.7 (5) |
| C (1) -N (1) -C (5)    | 120.2 (7) |
| C (1) -N (1) -Ru (1)   | 124.8 (6) |
| C (5) -N (1) -Ru (1)   | 114.6 (5) |
| C (10) -N (2) -C (6)   | 116.6 (7) |

|                      |            |
|----------------------|------------|
| C(10)-N(2)-Ru(1)     | 127.3(5)   |
| C(6)-N(2)-Ru(1)      | 115.8(5)   |
| O(1)-P(1)-C(32)      | 105.3(3)   |
| O(1)-P(1)-C(26)      | 107.6(3)   |
| C(32)-P(1)-C(26)     | 101.0(3)   |
| O(1)-P(1)-Ru(1)      | 109.33(19) |
| C(32)-P(1)-Ru(1)     | 112.3(2)   |
| C(26)-P(1)-Ru(1)     | 120.2(2)   |
| F(2B)-P(2)-F(2B)#1   | 140.4(15)  |
| F(2B)-P(2)-F(1)#1    | 118.3(8)   |
| F(2B)#1-P(2)-F(1)#1  | 90.3(8)    |
| F(2B)-P(2)-F(1)      | 90.3(8)    |
| F(2B)#1-P(2)-F(1)    | 118.3(8)   |
| F(1)#1-P(2)-F(1)     | 89.9(6)    |
| F(2B)-P(2)-F(2A)#1   | 101.1(10)  |
| F(2B)#1-P(2)-F(2A)#1 | 42.0(8)    |
| F(1)#1-P(2)-F(2A)#1  | 104.3(5)   |
| F(1)-P(2)-F(2A)#1    | 154.2(6)   |
| F(2B)-P(2)-F(2A)     | 42.0(8)    |
| F(2B)#1-P(2)-F(2A)   | 101.1(10)  |
| F(1)#1-P(2)-F(2A)    | 154.2(6)   |
| F(1)-P(2)-F(2A)      | 104.3(5)   |
| F(2A)#1-P(2)-F(2A)   | 71.5(9)    |
| F(2B)-P(2)-F(3A)#1   | 159.8(9)   |
| F(2B)#1-P(2)-F(3A)#1 | 39.3(8)    |
| F(1)#1-P(2)-F(3A)#1  | 79.8(5)    |
| F(1)-P(2)-F(3A)#1    | 80.4(5)    |
| F(2A)#1-P(2)-F(3A)#1 | 81.2(6)    |
| F(2A)-P(2)-F(3A)#1   | 123.2(7)   |
| F(2B)-P(2)-F(3A)     | 39.3(8)    |
| F(2B)#1-P(2)-F(3A)   | 159.8(9)   |
| F(1)#1-P(2)-F(3A)    | 80.4(5)    |
| F(1)-P(2)-F(3A)      | 79.8(5)    |
| F(2A)#1-P(2)-F(3A)   | 123.2(7)   |
| F(2A)-P(2)-F(3A)     | 81.2(6)    |
| F(3A)#1-P(2)-F(3A)   | 151.8(9)   |
| F(2B)-P(2)-F(3B)#1   | 76.7(9)    |
| F(2B)#1-P(2)-F(3B)#1 | 87.6(10)   |
| F(1)#1-P(2)-F(3B)#1  | 73.0(6)    |
| F(1)-P(2)-F(3B)#1    | 149.5(7)   |
| F(2A)#1-P(2)-F(3B)#1 | 56.3(7)    |
| F(2A)-P(2)-F(3B)#1   | 84.4(7)    |
| F(3A)#1-P(2)-F(3B)#1 | 119.6(7)   |
| F(3A)-P(2)-F(3B)#1   | 72.6(7)    |
| F(2B)-P(2)-F(3B)     | 87.6(10)   |
| F(2B)#1-P(2)-F(3B)   | 76.7(9)    |
| F(1)#1-P(2)-F(3B)    | 149.5(7)   |
| F(1)-P(2)-F(3B)      | 73.0(6)    |
| F(2A)#1-P(2)-F(3B)   | 84.4(7)    |
| F(2A)-P(2)-F(3B)     | 56.3(7)    |
| F(3A)#1-P(2)-F(3B)   | 72.6(7)    |
| F(3A)-P(2)-F(3B)     | 119.6(7)   |
| F(3B)#1-P(2)-F(3B)   | 132.6(12)  |
| F(9)-P(3)-P(3)#2     | 93.4(17)   |
| F(9)-P(3)-F(10)      | 111.5(14)  |
| P(3)#2-P(3)-F(10)    | 96.1(12)   |
| F(9)-P(3)-F(7)       | 80.6(9)    |
| P(3)#2-P(3)-F(7)     | 68.3(9)    |
| F(10)-P(3)-F(7)      | 161.4(17)  |
| F(9)-P(3)-F(8)       | 131.4(18)  |
| P(3)#2-P(3)-F(8)     | 124.3(11)  |

|                      |            |
|----------------------|------------|
| F(10)-P(3)-F(8)      | 95.2(8)    |
| F(7)-P(3)-F(8)       | 86.1(10)   |
| F(9)-P(3)-F(7)#2     | 116.5(9)   |
| P(3)#2-P(3)-F(7)#2   | 60.1(10)   |
| F(10)-P(3)-F(7)#2    | 126.7(15)  |
| F(7)-P(3)-F(7)#2     | 37.0(14)   |
| F(8)-P(3)-F(7)#2     | 69.7(11)   |
| F(9)-P(3)-F(9)#2     | 131.0(13)  |
| P(3)#2-P(3)-F(9)#2   | 39.8(7)    |
| F(10)-P(3)-F(9)#2    | 71.3(13)   |
| F(7)-P(3)-F(9)#2     | 90.1(13)   |
| F(8)-P(3)-F(9)#2     | 95.3(9)    |
| F(7)#2-P(3)-F(9)#2   | 60.4(11)   |
| F(9)-P(3)-F(10)#2    | 67.7(15)   |
| P(3)#2-P(3)-F(10)#2  | 42.0(6)    |
| F(10)-P(3)-F(10)#2   | 76.1(9)    |
| F(7)-P(3)-F(10)#2    | 96.8(8)    |
| F(8)-P(3)-F(10)#2    | 160.8(10)  |
| F(7)#2-P(3)-F(10)#2  | 101.5(10)  |
| F(9)#2-P(3)-F(10)#2  | 65.8(8)    |
| F(14)#3-P(4)-F(14)   | 180.0(4)   |
| F(14)#3-P(4)-F(15)#3 | 90.3(3)    |
| F(14)-P(4)-F(15)#3   | 89.7(3)    |
| F(14)#3-P(4)-F(15)   | 89.7(3)    |
| F(14)-P(4)-F(15)     | 90.3(3)    |
| F(15)#3-P(4)-F(15)   | 180.0(6)   |
| F(14)#3-P(4)-F(13)   | 89.7(3)    |
| F(14)-P(4)-F(13)     | 90.3(3)    |
| F(15)#3-P(4)-F(13)   | 89.8(3)    |
| F(15)-P(4)-F(13)     | 90.2(3)    |
| F(14)#3-P(4)-F(13)#3 | 90.3(3)    |
| F(14)-P(4)-F(13)#3   | 89.7(3)    |
| F(15)#3-P(4)-F(13)#3 | 90.2(3)    |
| F(15)-P(4)-F(13)#3   | 89.8(3)    |
| F(13)-P(4)-F(13)#3   | 180.0(4)   |
| N(4)-Ru(1)-N(3)      | 79.1(2)    |
| N(4)-Ru(1)-N(5)      | 79.2(3)    |
| N(3)-Ru(1)-N(5)      | 157.8(3)   |
| N(4)-Ru(1)-N(2)      | 172.8(2)   |
| N(3)-Ru(1)-N(2)      | 97.8(2)    |
| N(5)-Ru(1)-N(2)      | 103.3(3)   |
| N(4)-Ru(1)-N(1)      | 96.1(3)    |
| N(3)-Ru(1)-N(1)      | 87.5(2)    |
| N(5)-Ru(1)-N(1)      | 90.6(2)    |
| N(2)-Ru(1)-N(1)      | 77.2(3)    |
| N(4)-Ru(1)-P(1)      | 91.05(17)  |
| N(3)-Ru(1)-P(1)      | 86.16(15)  |
| N(5)-Ru(1)-P(1)      | 98.45(17)  |
| N(2)-Ru(1)-P(1)      | 95.24(17)  |
| N(1)-Ru(1)-P(1)      | 169.34(19) |
| F(7)#2-F(7)-P(3)     | 77.4(7)    |
| F(7)#2-F(7)-P(3)#2   | 65.6(17)   |
| P(3)-F(7)-P(3)#2     | 51.7(6)    |
| F(7)#2-F(7)-F(9)     | 118.2(8)   |
| P(3)-F(7)-F(9)       | 42.0(7)    |
| P(3)#2-F(7)-F(9)     | 66.9(12)   |
| F(7)#2-F(7)-F(8)#2   | 92(3)      |
| P(3)-F(7)-F(8)#2     | 101.9(8)   |
| P(3)#2-F(7)-F(8)#2   | 53.7(7)    |
| F(9)-F(7)-F(8)#2     | 90.5(13)   |
| P(3)-F(9)-F(7)       | 57.4(6)    |

|                   |           |
|-------------------|-----------|
| P(3)-F(9)-P(3)#2  | 46.8(11)  |
| F(7)-F(9)-P(3)#2  | 52.7(9)   |
| P(3)-F(8)-F(7)#2  | 56.7(9)   |
| P(3)-F(10)-P(3)#2 | 41.8(8)   |
| P(1)-O(1)-H(1B)   | 133.9(14) |

Symmetry transformations used to generate equivalent atoms:

#1 -x,y,-z+3/2    #2 -x+1,y,-z+1/2    #3 -x+1,-y,-z

**Table 4. Anisotropic displacement parameters ( $\text{Å}^2 \times 10^3$ ) for complex 2.**

The anisotropic displacement factor exponent takes the form:

$$-2 \pi^2 [ h^2 a^{*2} U_{11} + \dots + 2 h k a^* b^* U_{12} ]$$

|       | U11   | U22     | U33   | U23    | U13   | U12    |
|-------|-------|---------|-------|--------|-------|--------|
| C(11) | 38(4) | 36(4)   | 23(4) | 1(3)   | 13(3) | 0(3)   |
| C(12) | 31(4) | 50(5)   | 21(3) | 2(3)   | 12(3) | -1(3)  |
| C(13) | 28(4) | 43(4)   | 22(3) | -3(3)  | 9(3)  | -11(3) |
| C(14) | 36(4) | 36(4)   | 26(4) | -2(3)  | 20(3) | -6(3)  |
| C(15) | 30(4) | 40(4)   | 22(3) | -2(3)  | 15(3) | -5(3)  |
| C(16) | 30(4) | 47(4)   | 24(3) | 0(3)   | 15(3) | -3(3)  |
| C(17) | 36(4) | 62(5)   | 32(4) | 0(4)   | 19(3) | 7(4)   |
| C(18) | 32(4) | 70(6)   | 35(4) | 1(4)   | 19(3) | 11(4)  |
| C(19) | 27(4) | 83(7)   | 35(4) | 0(4)   | 19(3) | -3(4)  |
| C(20) | 29(4) | 63(5)   | 30(4) | -5(4)  | 17(3) | -9(4)  |
| C(21) | 37(4) | 68(6)   | 41(5) | -2(4)  | 21(4) | -12(4) |
| C(22) | 34(5) | 98(8)   | 49(5) | -20(5) | 7(4)  | -19(5) |
| C(23) | 52(6) | 110(10) | 81(8) | -21(7) | -1(6) | -34(7) |
| C(24) | 73(7) | 76(7)   | 68(7) | -21(6) | 6(6)  | -40(6) |
| C(25) | 70(6) | 61(6)   | 45(5) | -2(5)  | 12(5) | -20(5) |
| C(1)  | 45(5) | 61(6)   | 39(5) | -10(4) | 21(4) | -21(4) |
| C(2)  | 54(5) | 72(7)   | 50(5) | -9(5)  | 29(5) | -26(5) |
| C(3)  | 84(7) | 65(6)   | 41(5) | 0(5)   | 31(5) | -34(6) |
| C(4)  | 78(6) | 46(5)   | 38(5) | 2(4)   | 25(4) | -25(5) |
| C(5)  | 51(5) | 39(4)   | 35(4) | -3(4)  | 14(4) | -20(4) |
| C(6)  | 58(5) | 36(4)   | 28(4) | -5(3)  | 13(4) | -15(4) |
| C(7)  | 75(6) | 43(5)   | 43(5) | 5(4)   | 18(5) | -10(5) |
| C(8)  | 73(6) | 45(5)   | 60(6) | 7(5)   | 16(5) | 0(5)   |
| C(9)  | 71(6) | 43(5)   | 62(6) | -1(4)  | 27(5) | 6(5)   |
| C(10) | 75(6) | 39(5)   | 46(5) | 0(4)   | 26(5) | -2(4)  |
| C(26) | 51(5) | 36(4)   | 34(4) | -1(3)  | 19(4) | -8(3)  |
| C(27) | 53(5) | 38(4)   | 37(4) | -4(3)  | 21(4) | -3(4)  |
| C(28) | 75(6) | 50(5)   | 41(5) | -19(4) | 28(5) | -7(5)  |
| C(29) | 87(7) | 47(5)   | 36(5) | -18(4) | 20(5) | -23(5) |
| C(30) | 69(6) | 51(5)   | 36(5) | -8(4)  | 16(4) | -19(4) |
| C(31) | 53(5) | 48(5)   | 35(4) | -6(4)  | 17(4) | -15(4) |
| C(32) | 30(4) | 45(4)   | 18(3) | 1(3)   | 15(3) | -1(3)  |
| C(33) | 28(4) | 53(5)   | 24(4) | -6(3)  | 15(3) | -1(3)  |
| C(34) | 31(4) | 58(5)   | 29(4) | 4(4)   | 14(3) | 9(4)   |
| C(35) | 49(5) | 41(4)   | 37(4) | 4(4)   | 22(4) | 5(4)   |
| C(36) | 39(4) | 42(5)   | 30(4) | -1(3)  | 15(3) | -1(3)  |
| C(37) | 31(4) | 45(4)   | 21(3) | -1(3)  | 13(3) | -6(3)  |
| N(3)  | 32(3) | 40(3)   | 20(3) | 1(3)   | 17(2) | -2(3)  |
| N(4)  | 25(3) | 54(4)   | 24(3) | -2(3)  | 10(2) | -9(3)  |
| N(5)  | 51(4) | 53(4)   | 38(4) | -10(3) | 20(3) | -27(4) |

|       |         |         |         |          |         |          |
|-------|---------|---------|---------|----------|---------|----------|
| N(1)  | 44(4)   | 53(4)   | 32(3)   | -4(3)    | 16(3)   | -22(3)   |
| N(2)  | 54(4)   | 37(4)   | 29(3)   | -4(3)    | 14(3)   | -12(3)   |
| F(13) | 43(3)   | 104(4)  | 41(3)   | -2(3)    | 19(2)   | 11(3)    |
| F(14) | 52(3)   | 104(4)  | 35(3)   | 14(3)    | 15(2)   | 8(3)     |
| F(15) | 36(2)   | 112(4)  | 42(3)   | 3(3)     | 13(2)   | 3(3)     |
| P(1)  | 33(1)   | 39(1)   | 24(1)   | -3(1)    | 14(1)   | -5(1)    |
| P(2)  | 123(4)  | 44(2)   | 97(3)   | 0        | -54(3)  | 0        |
| P(3)  | 84(4)   | 63(3)   | 76(4)   | 24(3)    | 60(3)   | 27(3)    |
| P(4)  | 31(2)   | 96(3)   | 30(2)   | 7(2)     | 13(1)   | 9(2)     |
| Ru(1) | 37(1)   | 41(1)   | 25(1)   | -3(1)    | 15(1)   | -10(1)   |
| F(1)  | 150(7)  | 129(6)  | 53(4)   | 17(4)    | 26(4)   | 2(5)     |
| F(2A) | 117(6)  | 81(5)   | 79(5)   | -19(4)   | -6(4)   | 12(4)    |
| F(3A) | 117(6)  | 81(5)   | 79(5)   | -19(4)   | -6(4)   | 12(4)    |
| F(3B) | 117(6)  | 81(5)   | 79(5)   | -19(4)   | -6(4)   | 12(4)    |
| F(2B) | 117(6)  | 81(5)   | 79(5)   | -19(4)   | -6(4)   | 12(4)    |
| F(7)  | 110(8)  | 105(8)  | 330(20) | 131(11)  | 175(12) | 74(7)    |
| F(9)  | 730(40) | 188(13) | 700(40) | -255(19) | 700(40) | -242(19) |
| F(8)  | 400(20) | 202(13) | 390(20) | 146(15)  | 320(20) | 157(15)  |
| F(10) | 110(8)  | 105(8)  | 330(20) | 131(11)  | 175(12) | 74(7)    |
| O(1)  | 33(3)   | 41(3)   | 30(3)   | 0(2)     | 17(2)   | 2(2)     |

---



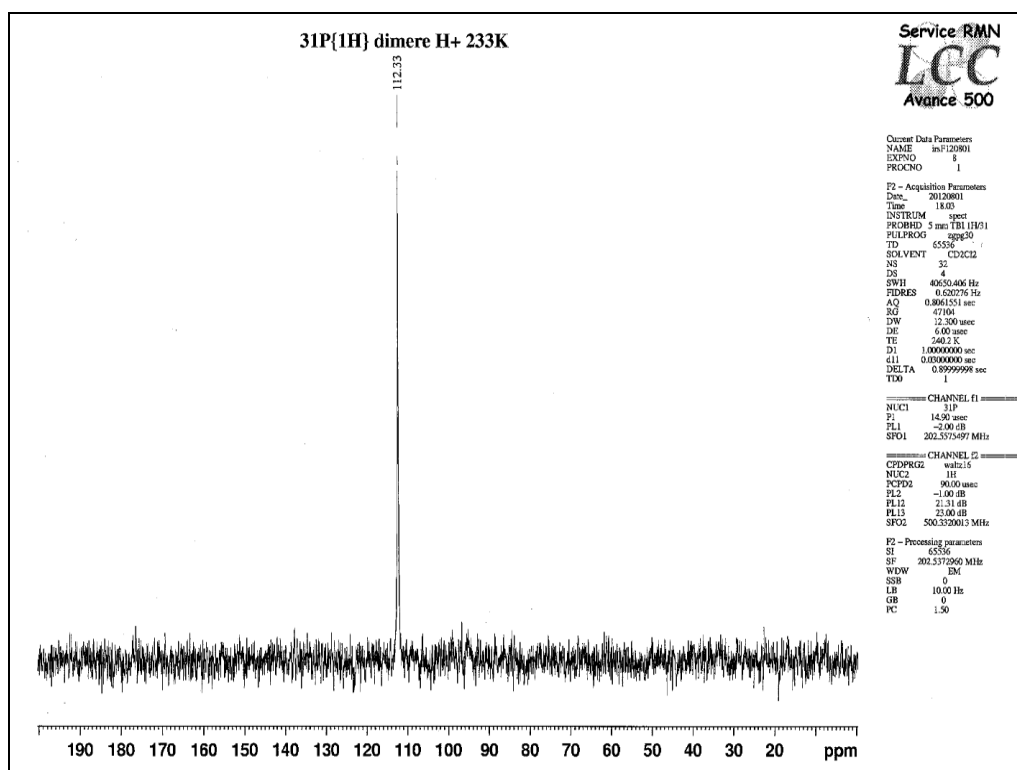

Figure S2 :  $^{31}\text{P}\{^1\text{H}\}$  NMR spectra of complex **2** in  $\text{CD}_2\text{Cl}_2$  at 233K.

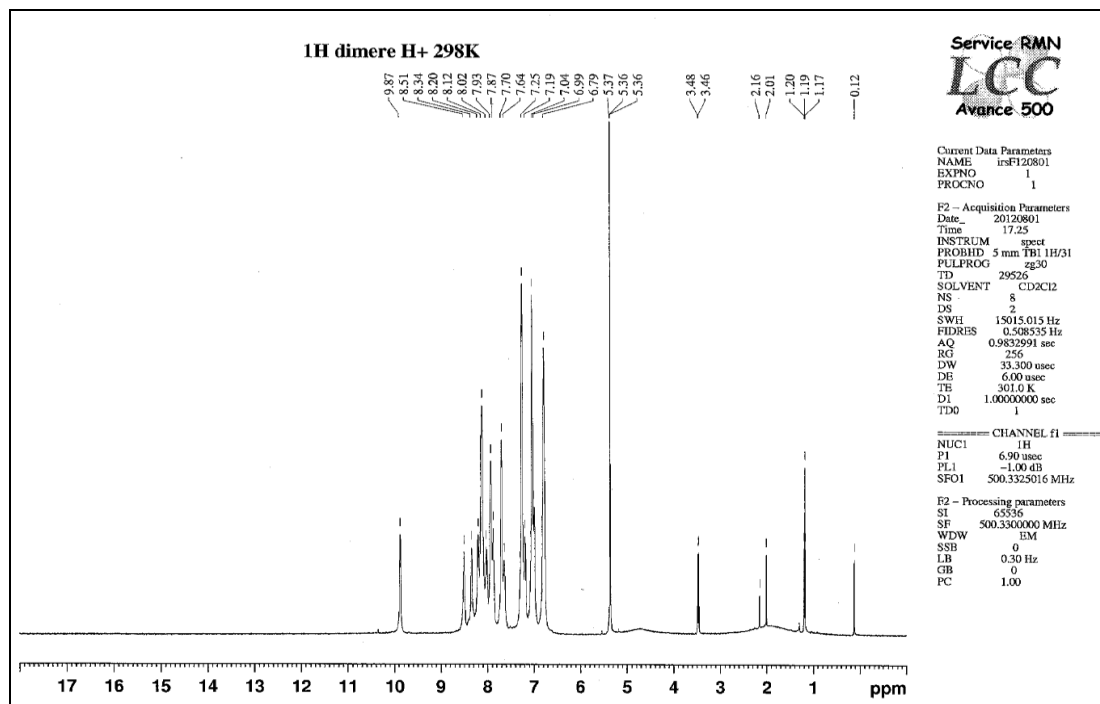

Figure S3 :  $^1\text{H}$  NMR spectra of complex **2** in  $\text{CD}_2\text{Cl}_2$  at 298K.

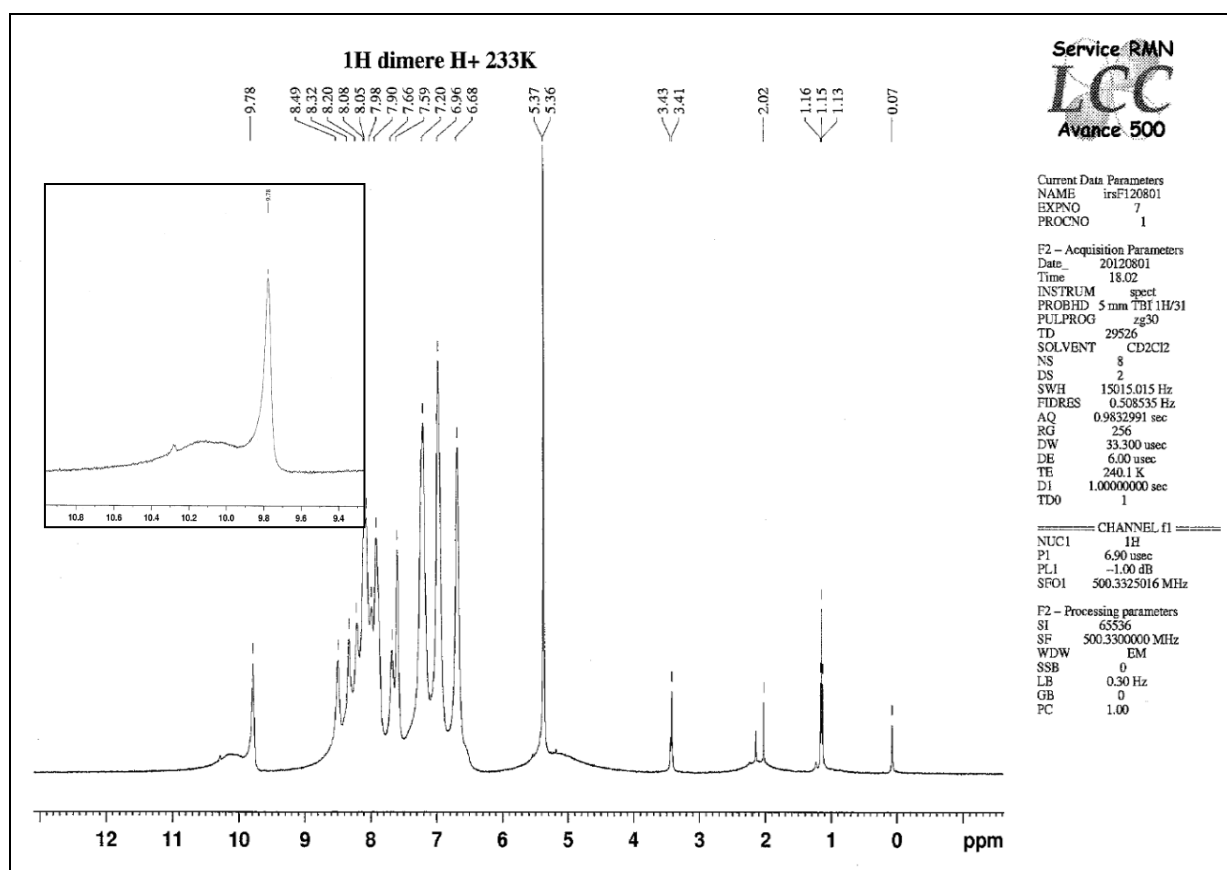

Figure S4 : <sup>1</sup>H NMR spectra of complex **2** in CD<sub>2</sub>Cl<sub>2</sub> at 233K.

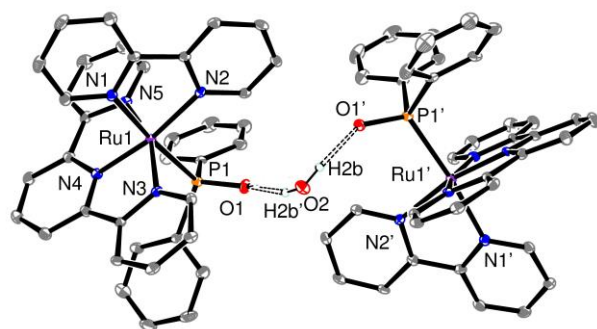

Figure S5. Molecular structure of complex 3.

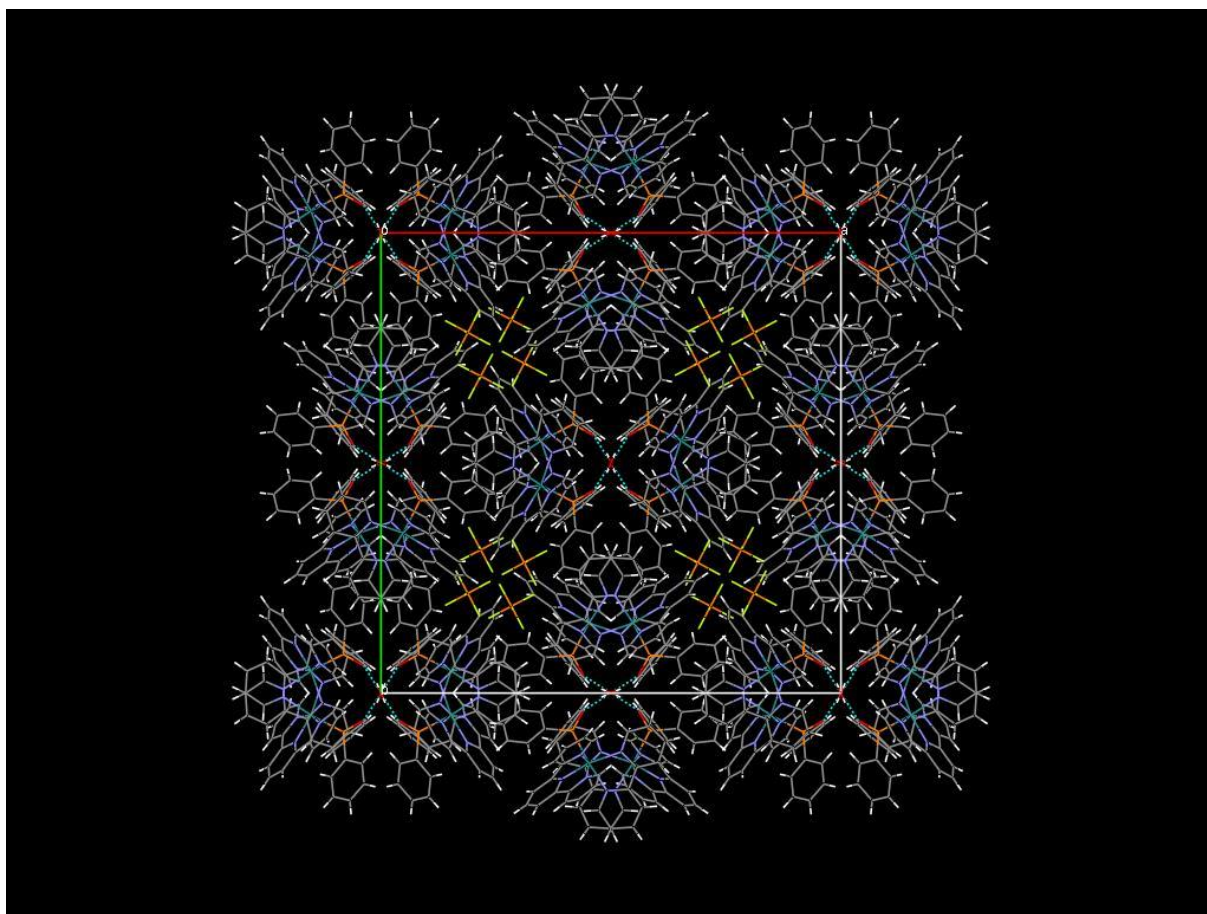

Figure S6. Packing of the molecular structure of complex 3 viewed along the C axis.

Table 5. Crystal data and structure refinement for complex **3**.

|                                   |                                                                                                                  |
|-----------------------------------|------------------------------------------------------------------------------------------------------------------|
| Identification code               | rsi070212                                                                                                        |
| Empirical formula                 | 2(C37 H29 N5 O P Ru), 2(F6 P), H2 O                                                                              |
| Formula weight                    | 1691.34                                                                                                          |
| Temperature                       | 100(2) K                                                                                                         |
| Wavelength                        | 0.71073 Å                                                                                                        |
| Crystal system, space group       | Tetragonal, I 41 c d                                                                                             |
| Unit cell dimensions              | a = 28.4278(6) Å    alpha = 90 deg.<br>b = 28.4278(6) Å    beta = 90 deg.<br>c = 17.0604(4) Å    gamma = 90 deg. |
| Volume                            | 13787.2(5) Å <sup>3</sup>                                                                                        |
| Z, Calculated density             | 8, 1.630 Mg/m <sup>3</sup>                                                                                       |
| Absorption coefficient            | 0.622 mm <sup>-1</sup>                                                                                           |
| F(000)                            | 6832                                                                                                             |
| Crystal size                      | 0.15 x 0.03 x 0.02 mm                                                                                            |
| Theta range for data collection   | 2.00 to 21.70 deg.                                                                                               |
| Limiting indices                  | -29<=h<=29, -29<=k<=28, -17<=l<=17                                                                               |
| Reflections collected / unique    | 98325 / 4063 [R(int) = 0.0583]                                                                                   |
| Completeness to theta = 21.70     | 100.0 %                                                                                                          |
| Absorption correction             | Semi-empirical from equivalents                                                                                  |
| Max. and min. transmission        | 0.989 and 0.812                                                                                                  |
| Refinement method                 | Full-matrix least-squares on F <sup>2</sup>                                                                      |
| Data / restraints / parameters    | 4063 / 1 / 477                                                                                                   |
| Goodness-of-fit on F <sup>2</sup> | 1.056                                                                                                            |
| Final R indices [I>2sigma(I)]     | R1 = 0.0163, wR2 = 0.0349                                                                                        |
| R indices (all data)              | R1 = 0.0195, wR2 = 0.0360                                                                                        |
| Absolute structure parameter      | -0.032(16)                                                                                                       |
| Largest diff. peak and hole       | 0.150 and -0.147 e.Å <sup>-3</sup>                                                                               |

**Table 6. Atomic coordinates and equivalent isotropic displacement parameters for complex 3.**

U(eq) is defined as one third of the trace of the orthogonalized U<sub>ij</sub> tensor.

|        | x         | y        | z         | U (eq) |
|--------|-----------|----------|-----------|--------|
| C (1)  | 10267 (1) | 7546 (1) | 11067 (2) | 22 (1) |
| C (3)  | 9521 (1)  | 7914 (1) | 11132 (2) | 30 (1) |
| C (2)  | 9998 (1)  | 7945 (1) | 10989 (2) | 30 (1) |
| C (4)  | 9325 (1)  | 7485 (1) | 11321 (2) | 25 (1) |
| C (5)  | 9616 (1)  | 7090 (1) | 11378 (2) | 17 (1) |
| C (6)  | 9439 (1)  | 6615 (1) | 11551 (2) | 16 (1) |
| C (7)  | 8966 (1)  | 6503 (1) | 11560 (2) | 20 (1) |
| C (8)  | 8823 (1)  | 6049 (1) | 11724 (2) | 21 (1) |
| C (9)  | 9161 (1)  | 5715 (1) | 11890 (2) | 19 (1) |
| C (10) | 9631 (1)  | 5843 (1) | 11870 (2) | 17 (1) |
| C (11) | 10421 (1) | 6048 (1) | 9997 (2)  | 18 (1) |
| C (12) | 10567 (1) | 5966 (1) | 9236 (2)  | 19 (1) |
| C (13) | 10968 (1) | 6187 (1) | 8965 (2)  | 21 (1) |
| C (14) | 11217 (1) | 6479 (1) | 9465 (2)  | 20 (1) |
| C (15) | 11056 (1) | 6551 (1) | 10223 (2) | 16 (1) |
| C (16) | 11289 (1) | 6861 (1) | 10797 (2) | 18 (1) |
| C (17) | 11681 (1) | 7142 (1) | 10673 (2) | 25 (1) |
| C (18) | 11837 (1) | 7429 (1) | 11277 (2) | 29 (1) |
| C (19) | 11596 (1) | 7444 (1) | 11982 (2) | 26 (1) |
| C (20) | 11205 (1) | 7159 (1) | 12091 (2) | 19 (1) |
| C (21) | 10905 (1) | 7130 (1) | 12784 (2) | 20 (1) |
| C (22) | 10988 (1) | 7367 (1) | 13479 (2) | 28 (1) |
| C (23) | 10695 (1) | 7302 (1) | 14106 (2) | 34 (1) |
| C (24) | 10320 (1) | 7003 (1) | 14039 (2) | 31 (1) |
| C (25) | 10245 (1) | 6771 (1) | 13341 (2) | 23 (1) |
| C (26) | 10925 (1) | 5766 (1) | 13064 (2) | 19 (1) |
| C (27) | 11204 (1) | 6063 (1) | 13519 (2) | 26 (1) |
| C (29) | 10964 (1) | 5663 (1) | 14687 (2) | 43 (1) |
| C (30) | 10688 (1) | 5365 (1) | 14249 (2) | 41 (1) |
| C (31) | 10668 (1) | 5416 (1) | 13441 (2) | 30 (1) |
| C (32) | 11447 (1) | 5772 (1) | 11614 (2) | 18 (1) |
| C (33) | 11816 (1) | 6081 (1) | 11793 (2) | 23 (1) |
| C (34) | 12250 (1) | 6035 (1) | 11444 (2) | 31 (1) |
| C (35) | 12335 (1) | 5681 (1) | 10922 (2) | 40 (1) |
| C (36) | 11978 (1) | 5369 (1) | 10737 (2) | 42 (1) |
| C (37) | 11534 (1) | 5413 (1) | 11079 (2) | 28 (1) |
| N (1)  | 10084 (1) | 7125 (1) | 11268 (1) | 17 (1) |
| N (2)  | 9779 (1)  | 6281 (1) | 11704 (1) | 14 (1) |
| N (3)  | 10651 (1) | 6336 (1) | 10488 (1) | 14 (1) |
| N (4)  | 11067 (1) | 6868 (1) | 11499 (1) | 16 (1) |
| N (5)  | 10530 (1) | 6830 (1) | 12716 (1) | 18 (1) |
| O (1)  | 10594 (1) | 5376 (1) | 11741 (1) | 23 (1) |
| F (1)  | 12430 (1) | 7375 (1) | 17605 (1) | 28 (1) |
| F (2)  | 12192 (1) | 6953 (1) | 18662 (1) | 44 (1) |
| F (3)  | 11903 (1) | 6392 (1) | 17860 (1) | 42 (1) |
| F (4)  | 12666 (1) | 6624 (1) | 17745 (1) | 35 (1) |
| F (5)  | 11668 (1) | 7145 (1) | 17720 (1) | 35 (1) |
| F (6)  | 12134 (1) | 6814 (1) | 16806 (1) | 27 (1) |
| P (1)  | 10844 (1) | 5822 (1) | 11999 (1) | 16 (1) |
| P (2)  | 12166 (1) | 6888 (1) | 17735 (1) | 23 (1) |
| Ru (1) | 10481 (1) | 6521 (1) | 11625 (1) | 14 (1) |
| C (28) | 11224 (1) | 6008 (1) | 14323 (2) | 35 (1) |
| O (2)  | 10000     | 5000     | 10634 (2) | 25 (1) |

Table 7. Bond lengths [Å] and angles [deg] for complex **3**.

---

|                |           |
|----------------|-----------|
| C (1) -N (1)   | 1.349 (4) |
| C (1) -C (2)   | 1.376 (4) |
| C (1) -H (1)   | 0.9500    |
| C (3) -C (2)   | 1.378 (4) |
| C (3) -C (4)   | 1.380 (4) |
| C (3) -H (3)   | 0.9500    |
| C (2) -H (2)   | 0.9500    |
| C (4) -C (5)   | 1.397 (4) |
| C (4) -H (4)   | 0.9500    |
| C (5) -N (1)   | 1.348 (4) |
| C (5) -C (6)   | 1.471 (4) |
| C (6) -N (2)   | 1.380 (3) |
| C (6) -C (7)   | 1.382 (4) |
| C (7) -C (8)   | 1.382 (4) |
| C (7) -H (7)   | 0.9500    |
| C (8) -C (9)   | 1.381 (4) |
| C (8) -H (8)   | 0.9500    |
| C (9) -C (10)  | 1.383 (4) |
| C (9) -H (9)   | 0.9500    |
| C (10) -N (2)  | 1.343 (3) |
| C (10) -H (10) | 0.9500    |
| C (11) -N (3)  | 1.341 (4) |
| C (11) -C (12) | 1.383 (4) |
| C (11) -H (11) | 0.9500    |
| C (12) -C (13) | 1.383 (4) |
| C (12) -H (12) | 0.9500    |
| C (13) -C (14) | 1.386 (4) |
| C (13) -H (13) | 0.9500    |
| C (14) -C (15) | 1.386 (4) |
| C (14) -H (14) | 0.9500    |
| C (15) -N (3)  | 1.379 (4) |
| C (15) -C (16) | 1.475 (4) |
| C (16) -N (4)  | 1.355 (4) |
| C (16) -C (17) | 1.388 (4) |
| C (17) -C (18) | 1.387 (4) |
| C (17) -H (17) | 0.9500    |
| C (18) -C (19) | 1.384 (4) |
| C (18) -H (18) | 0.9500    |
| C (19) -C (20) | 1.391 (4) |
| C (19) -H (19) | 0.9500    |
| C (20) -N (4)  | 1.362 (4) |
| C (20) -C (21) | 1.459 (4) |
| C (21) -N (5)  | 1.370 (4) |
| C (21) -C (22) | 1.384 (4) |
| C (22) -C (23) | 1.368 (5) |
| C (22) -H (22) | 0.9500    |
| C (23) -C (24) | 1.369 (4) |
| C (23) -H (23) | 0.9500    |
| C (24) -C (25) | 1.378 (4) |
| C (24) -H (24) | 0.9500    |
| C (25) -N (5)  | 1.348 (4) |
| C (25) -H (25) | 0.9500    |
| C (26) -C (31) | 1.392 (4) |
| C (26) -C (27) | 1.394 (4) |
| C (26) -P (1)  | 1.838 (3) |
| C (27) -C (28) | 1.383 (5) |
| C (27) -H (27) | 0.9500    |

|                      |             |
|----------------------|-------------|
| C (29) -C (30)       | 1.373 (5)   |
| C (29) -C (28)       | 1.377 (5)   |
| C (29) -H (29)       | 0.9500      |
| C (30) -C (31)       | 1.388 (5)   |
| C (30) -H (30)       | 0.9500      |
| C (31) -H (31)       | 0.9500      |
| C (32) -C (37)       | 1.391 (4)   |
| C (32) -C (33)       | 1.401 (4)   |
| C (32) -P (1)        | 1.843 (3)   |
| C (33) -C (34)       | 1.376 (4)   |
| C (33) -H (33)       | 0.9500      |
| C (34) -C (35)       | 1.366 (5)   |
| C (34) -H (34)       | 0.9500      |
| C (35) -C (36)       | 1.384 (5)   |
| C (35) -H (35)       | 0.9500      |
| C (36) -C (37)       | 1.394 (5)   |
| C (36) -H (36)       | 0.9500      |
| C (37) -H (37)       | 0.9500      |
| N (1) -Ru (1)        | 2.142 (2)   |
| N (2) -Ru (1)        | 2.112 (2)   |
| N (3) -Ru (1)        | 2.067 (2)   |
| N (4) -Ru (1)        | 1.949 (2)   |
| N (5) -Ru (1)        | 2.063 (2)   |
| O (1) -P (1)         | 1.5199 (19) |
| F (1) -P (2)         | 1.5918 (18) |
| F (2) -P (2)         | 1.5928 (19) |
| F (3) -P (2)         | 1.6084 (19) |
| F (4) -P (2)         | 1.6061 (18) |
| F (5) -P (2)         | 1.594 (2)   |
| F (6) -P (2)         | 1.6020 (17) |
| P (1) -Ru (1)        | 2.3260 (8)  |
| C (28) -H (28)       | 0.9500      |
| O (2) -H (2B)        | 0.79 (3)    |
|                      |             |
| N (1) -C (1) -C (2)  | 122.8 (3)   |
| N (1) -C (1) -H (1)  | 118.6       |
| C (2) -C (1) -H (1)  | 118.6       |
| C (2) -C (3) -C (4)  | 119.6 (3)   |
| C (2) -C (3) -H (3)  | 120.2       |
| C (4) -C (3) -H (3)  | 120.2       |
| C (1) -C (2) -C (3)  | 118.5 (3)   |
| C (1) -C (2) -H (2)  | 120.7       |
| C (3) -C (2) -H (2)  | 120.7       |
| C (3) -C (4) -C (5)  | 119.1 (3)   |
| C (3) -C (4) -H (4)  | 120.4       |
| C (5) -C (4) -H (4)  | 120.4       |
| N (1) -C (5) -C (4)  | 121.2 (3)   |
| N (1) -C (5) -C (6)  | 115.5 (2)   |
| C (4) -C (5) -C (6)  | 123.3 (3)   |
| N (2) -C (6) -C (7)  | 121.3 (2)   |
| N (2) -C (6) -C (5)  | 115.5 (2)   |
| C (7) -C (6) -C (5)  | 123.1 (2)   |
| C (6) -C (7) -C (8)  | 120.3 (3)   |
| C (6) -C (7) -H (7)  | 119.9       |
| C (8) -C (7) -H (7)  | 119.9       |
| C (9) -C (8) -C (7)  | 118.6 (3)   |
| C (9) -C (8) -H (8)  | 120.7       |
| C (7) -C (8) -H (8)  | 120.7       |
| C (8) -C (9) -C (10) | 119.0 (3)   |
| C (8) -C (9) -H (9)  | 120.5       |
| C (10) -C (9) -H (9) | 120.5       |

|                   |          |
|-------------------|----------|
| N(2)-C(10)-C(9)   | 123.6(3) |
| N(2)-C(10)-H(10)  | 118.2    |
| C(9)-C(10)-H(10)  | 118.2    |
| N(3)-C(11)-C(12)  | 123.0(3) |
| N(3)-C(11)-H(11)  | 118.5    |
| C(12)-C(11)-H(11) | 118.5    |
| C(13)-C(12)-C(11) | 118.9(3) |
| C(13)-C(12)-H(12) | 120.6    |
| C(11)-C(12)-H(12) | 120.6    |
| C(12)-C(13)-C(14) | 119.3(3) |
| C(12)-C(13)-H(13) | 120.4    |
| C(14)-C(13)-H(13) | 120.4    |
| C(13)-C(14)-C(15) | 119.6(3) |
| C(13)-C(14)-H(14) | 120.2    |
| C(15)-C(14)-H(14) | 120.2    |
| N(3)-C(15)-C(14)  | 121.1(3) |
| N(3)-C(15)-C(16)  | 114.9(2) |
| C(14)-C(15)-C(16) | 123.9(3) |
| N(4)-C(16)-C(17)  | 120.1(3) |
| N(4)-C(16)-C(15)  | 112.7(2) |
| C(17)-C(16)-C(15) | 127.2(3) |
| C(18)-C(17)-C(16) | 118.8(3) |
| C(18)-C(17)-H(17) | 120.6    |
| C(16)-C(17)-H(17) | 120.6    |
| C(19)-C(18)-C(17) | 120.4(3) |
| C(19)-C(18)-H(18) | 119.8    |
| C(17)-C(18)-H(18) | 119.8    |
| C(18)-C(19)-C(20) | 119.7(3) |
| C(18)-C(19)-H(19) | 120.2    |
| C(20)-C(19)-H(19) | 120.2    |
| N(4)-C(20)-C(19)  | 118.9(3) |
| N(4)-C(20)-C(21)  | 113.5(2) |
| C(19)-C(20)-C(21) | 127.5(3) |
| N(5)-C(21)-C(22)  | 120.5(3) |
| N(5)-C(21)-C(20)  | 114.9(2) |
| C(22)-C(21)-C(20) | 124.6(3) |
| C(23)-C(22)-C(21) | 120.1(3) |
| C(23)-C(22)-H(22) | 120.0    |
| C(21)-C(22)-H(22) | 120.0    |
| C(22)-C(23)-C(24) | 119.4(3) |
| C(22)-C(23)-H(23) | 120.3    |
| C(24)-C(23)-H(23) | 120.3    |
| C(23)-C(24)-C(25) | 119.3(3) |
| C(23)-C(24)-H(24) | 120.3    |
| C(25)-C(24)-H(24) | 120.3    |
| N(5)-C(25)-C(24)  | 122.1(3) |
| N(5)-C(25)-H(25)  | 118.9    |
| C(24)-C(25)-H(25) | 118.9    |
| C(31)-C(26)-C(27) | 118.2(3) |
| C(31)-C(26)-P(1)  | 117.0(2) |
| C(27)-C(26)-P(1)  | 124.7(2) |
| C(28)-C(27)-C(26) | 120.5(3) |
| C(28)-C(27)-H(27) | 119.7    |
| C(26)-C(27)-H(27) | 119.7    |
| C(30)-C(29)-C(28) | 120.0(3) |
| C(30)-C(29)-H(29) | 120.0    |
| C(28)-C(29)-H(29) | 120.0    |
| C(29)-C(30)-C(31) | 119.9(3) |
| C(29)-C(30)-H(30) | 120.0    |
| C(31)-C(30)-H(30) | 120.0    |
| C(30)-C(31)-C(26) | 120.9(3) |



|                        |             |
|------------------------|-------------|
| C (30) -C (31) -H (31) | 119.6       |
| C (26) -C (31) -H (31) | 119.6       |
| C (37) -C (32) -C (33) | 118.1 (3)   |
| C (37) -C (32) -P (1)  | 117.2 (2)   |
| C (33) -C (32) -P (1)  | 124.7 (2)   |
| C (34) -C (33) -C (32) | 121.0 (3)   |
| C (34) -C (33) -H (33) | 119.5       |
| C (32) -C (33) -H (33) | 119.5       |
| C (35) -C (34) -C (33) | 120.8 (3)   |
| C (35) -C (34) -H (34) | 119.6       |
| C (33) -C (34) -H (34) | 119.6       |
| C (34) -C (35) -C (36) | 119.3 (3)   |
| C (34) -C (35) -H (35) | 120.4       |
| C (36) -C (35) -H (35) | 120.4       |
| C (35) -C (36) -C (37) | 120.8 (3)   |
| C (35) -C (36) -H (36) | 119.6       |
| C (37) -C (36) -H (36) | 119.6       |
| C (32) -C (37) -C (36) | 120.0 (3)   |
| C (32) -C (37) -H (37) | 120.0       |
| C (36) -C (37) -H (37) | 120.0       |
| C (5) -N (1) -C (1)    | 118.7 (2)   |
| C (5) -N (1) -Ru (1)   | 115.00 (18) |
| C (1) -N (1) -Ru (1)   | 125.5 (2)   |
| C (10) -N (2) -C (6)   | 117.2 (2)   |
| C (10) -N (2) -Ru (1)  | 127.54 (18) |
| C (6) -N (2) -Ru (1)   | 115.26 (17) |
| C (11) -N (3) -C (15)  | 118.2 (2)   |
| C (11) -N (3) -Ru (1)  | 128.77 (19) |
| C (15) -N (3) -Ru (1)  | 113.05 (18) |
| C (16) -N (4) -C (20)  | 122.1 (2)   |
| C (16) -N (4) -Ru (1)  | 119.27 (19) |
| C (20) -N (4) -Ru (1)  | 118.08 (19) |
| C (25) -N (5) -C (21)  | 118.5 (2)   |
| C (25) -N (5) -Ru (1)  | 128.28 (19) |
| C (21) -N (5) -Ru (1)  | 113.24 (19) |
| O (1) -P (1) -C (26)   | 105.78 (13) |
| O (1) -P (1) -C (32)   | 105.45 (12) |
| C (26) -P (1) -C (32)  | 103.22 (14) |
| O (1) -P (1) -Ru (1)   | 115.26 (8)  |
| C (26) -P (1) -Ru (1)  | 113.61 (9)  |
| C (32) -P (1) -Ru (1)  | 112.45 (9)  |
| F (1) -P (2) -F (2)    | 90.86 (10)  |
| F (1) -P (2) -F (5)    | 90.98 (10)  |
| F (2) -P (2) -F (5)    | 90.21 (10)  |
| F (1) -P (2) -F (6)    | 90.18 (9)   |
| F (2) -P (2) -F (6)    | 178.95 (12) |
| F (5) -P (2) -F (6)    | 89.63 (10)  |
| F (1) -P (2) -F (4)    | 89.48 (10)  |
| F (2) -P (2) -F (4)    | 90.18 (10)  |
| F (5) -P (2) -F (4)    | 179.39 (11) |
| F (6) -P (2) -F (4)    | 89.98 (10)  |
| F (1) -P (2) -F (3)    | 179.35 (12) |
| F (2) -P (2) -F (3)    | 89.55 (11)  |
| F (5) -P (2) -F (3)    | 89.51 (10)  |
| F (6) -P (2) -F (3)    | 89.41 (10)  |
| F (4) -P (2) -F (3)    | 90.02 (10)  |
| N (4) -Ru (1) -N (5)   | 79.95 (10)  |
| N (4) -Ru (1) -N (3)   | 79.88 (9)   |
| N (5) -Ru (1) -N (3)   | 159.84 (9)  |
| N (4) -Ru (1) -N (2)   | 167.95 (8)  |
| N (5) -Ru (1) -N (2)   | 98.27 (9)   |

|                        |            |
|------------------------|------------|
| N (3) -Ru (1) -N (2)   | 101.50 (9) |
| N (4) -Ru (1) -N (1)   | 90.69 (9)  |
| N (5) -Ru (1) -N (1)   | 87.11 (8)  |
| N (3) -Ru (1) -N (1)   | 93.41 (9)  |
| N (2) -Ru (1) -N (1)   | 77.29 (9)  |
| N (4) -Ru (1) -P (1)   | 94.80 (7)  |
| N (5) -Ru (1) -P (1)   | 95.01 (7)  |
| N (3) -Ru (1) -P (1)   | 86.40 (7)  |
| N (2) -Ru (1) -P (1)   | 97.23 (6)  |
| N (1) -Ru (1) -P (1)   | 174.38 (7) |
| C (29) -C (28) -C (27) | 120.4 (3)  |
| C (29) -C (28) -H (28) | 119.8      |
| C (27) -C (28) -H (28) | 119.8      |

Table 8. Anisotropic displacement parameters ( $\text{\AA}^2 \times 10^3$ ) for complex **3**.

The anisotropic displacement factor exponent takes the form:  
 $-2 \pi^2 [ h^2 a^{*2} U_{11} + \dots + 2 h k a^* b^* U_{12} ]$

|        | U11    | U22    | U33    | U23     | U13     | U12    |
|--------|--------|--------|--------|---------|---------|--------|
| C (1)  | 21 (2) | 21 (2) | 25 (2) | -3 (2)  | -4 (1)  | -3 (2) |
| C (3)  | 31 (2) | 18 (2) | 42 (2) | -4 (2)  | -13 (2) | 7 (2)  |
| C (2)  | 30 (2) | 18 (2) | 42 (2) | 4 (2)   | -13 (2) | 0 (2)  |
| C (4)  | 20 (2) | 27 (2) | 27 (2) | -7 (2)  | -6 (1)  | -1 (2) |
| C (5)  | 19 (2) | 21 (2) | 12 (2) | -4 (1)  | -2 (1)  | 5 (1)  |
| C (6)  | 18 (2) | 21 (2) | 10 (2) | -5 (2)  | 1 (2)   | 1 (1)  |
| C (7)  | 13 (2) | 25 (2) | 21 (2) | -6 (2)  | -6 (2)  | 5 (1)  |
| C (8)  | 13 (2) | 34 (2) | 18 (2) | -3 (2)  | 0 (2)   | 0 (1)  |
| C (9)  | 20 (2) | 23 (2) | 13 (2) | -3 (1)  | 4 (1)   | -6 (1) |
| C (10) | 18 (2) | 21 (2) | 13 (2) | -5 (1)  | 0 (1)   | 2 (1)  |
| C (11) | 15 (2) | 17 (2) | 21 (2) | 4 (2)   | -3 (1)  | 0 (1)  |
| C (12) | 21 (2) | 22 (2) | 15 (2) | -3 (1)  | -5 (2)  | 4 (1)  |
| C (13) | 30 (2) | 23 (2) | 11 (2) | -2 (1)  | -1 (1)  | 6 (2)  |
| C (14) | 18 (2) | 20 (2) | 23 (2) | 5 (1)   | 6 (2)   | 5 (1)  |
| C (15) | 12 (2) | 15 (2) | 21 (2) | 1 (1)   | 1 (1)   | 4 (1)  |
| C (16) | 17 (2) | 19 (2) | 19 (2) | 4 (1)   | 1 (1)   | 1 (1)  |
| C (17) | 23 (2) | 27 (2) | 24 (2) | -1 (2)  | 4 (2)   | -3 (2) |
| C (18) | 19 (2) | 28 (2) | 39 (2) | -3 (2)  | 2 (2)   | -7 (2) |
| C (19) | 20 (2) | 22 (2) | 36 (2) | -9 (2)  | -5 (2)  | -4 (2) |
| C (20) | 15 (2) | 19 (2) | 24 (2) | -2 (2)  | -5 (1)  | 3 (1)  |
| C (21) | 19 (2) | 19 (2) | 21 (2) | -6 (1)  | -10 (2) | 1 (1)  |
| C (22) | 30 (2) | 25 (2) | 28 (2) | -7 (2)  | -5 (2)  | -4 (2) |
| C (23) | 41 (2) | 41 (2) | 19 (2) | -10 (2) | -5 (2)  | 0 (2)  |
| C (24) | 35 (2) | 38 (2) | 20 (2) | -2 (2)  | 4 (2)   | 0 (2)  |
| C (25) | 25 (2) | 25 (2) | 18 (2) | -5 (2)  | -1 (2)  | 0 (1)  |
| C (26) | 19 (2) | 21 (2) | 16 (2) | 2 (2)   | 4 (1)   | 7 (1)  |
| C (27) | 28 (2) | 29 (2) | 21 (2) | 5 (2)   | -4 (2)  | 1 (2)  |
| C (29) | 71 (3) | 42 (2) | 15 (2) | 4 (2)   | 4 (2)   | 16 (2) |
| C (30) | 63 (2) | 32 (2) | 27 (2) | 10 (2)  | 24 (2)  | 4 (2)  |
| C (31) | 32 (2) | 30 (2) | 29 (2) | 1 (2)   | 11 (2)  | 3 (2)  |
| C (32) | 23 (2) | 19 (2) | 13 (2) | 2 (2)   | 1 (2)   | 9 (1)  |
| C (33) | 17 (2) | 27 (2) | 24 (2) | 2 (1)   | -2 (1)  | 6 (1)  |

|        |        |        |        |         |         |         |
|--------|--------|--------|--------|---------|---------|---------|
| C (34) | 23 (2) | 41 (2) | 29 (2) | 12 (2)  | -2 (2)  | 2 (2)   |
| C (35) | 28 (2) | 44 (2) | 47 (2) | 10 (2)  | 17 (2)  | 8 (2)   |
| C (36) | 56 (3) | 37 (2) | 33 (2) | -3 (2)  | 21 (2)  | 16 (2)  |
| C (37) | 38 (2) | 23 (2) | 23 (2) | 3 (2)   | 6 (2)   | 3 (2)   |
| N (1)  | 18 (2) | 16 (2) | 16 (1) | -2 (1)  | -1 (1)  | -1 (1)  |
| N (2)  | 20 (1) | 14 (1) | 8 (1)  | -2 (1)  | -1 (1)  | 1 (1)   |
| N (3)  | 15 (1) | 14 (1) | 14 (1) | -1 (1)  | -3 (1)  | 3 (1)   |
| N (4)  | 12 (1) | 18 (1) | 17 (2) | -1 (1)  | -5 (1)  | 1 (1)   |
| N (5)  | 19 (1) | 21 (2) | 14 (1) | -1 (1)  | -4 (1)  | 3 (1)   |
| O (1)  | 22 (1) | 17 (1) | 29 (1) | -3 (1)  | -8 (1)  | -1 (1)  |
| F (1)  | 31 (1) | 20 (1) | 33 (1) | -1 (1)  | 4 (1)   | -3 (1)  |
| F (2)  | 37 (1) | 74 (2) | 19 (1) | 0 (1)   | -1 (1)  | -22 (1) |
| F (3)  | 42 (1) | 35 (1) | 48 (1) | 14 (1)  | -15 (1) | -21 (1) |
| F (4)  | 26 (1) | 28 (1) | 50 (1) | 2 (1)   | -8 (1)  | 4 (1)   |
| F (5)  | 23 (1) | 50 (1) | 33 (1) | -13 (1) | 4 (1)   | 5 (1)   |
| F (6)  | 31 (1) | 31 (1) | 20 (1) | -7 (1)  | 2 (1)   | 6 (1)   |
| P (1)  | 15 (1) | 19 (1) | 15 (1) | 0 (1)   | -2 (1)  | 1 (1)   |
| P (2)  | 22 (1) | 26 (1) | 22 (1) | 1 (1)   | 0 (1)   | -4 (1)  |
| Ru (1) | 13 (1) | 16 (1) | 13 (1) | -1 (1)  | -2 (1)  | 0 (1)   |
| C (28) | 47 (2) | 35 (2) | 23 (2) | -4 (2)  | -9 (2)  | 9 (2)   |
| O (2)  | 23 (2) | 36 (2) | 15 (2) | 0       | 0       | -5 (2)  |

---

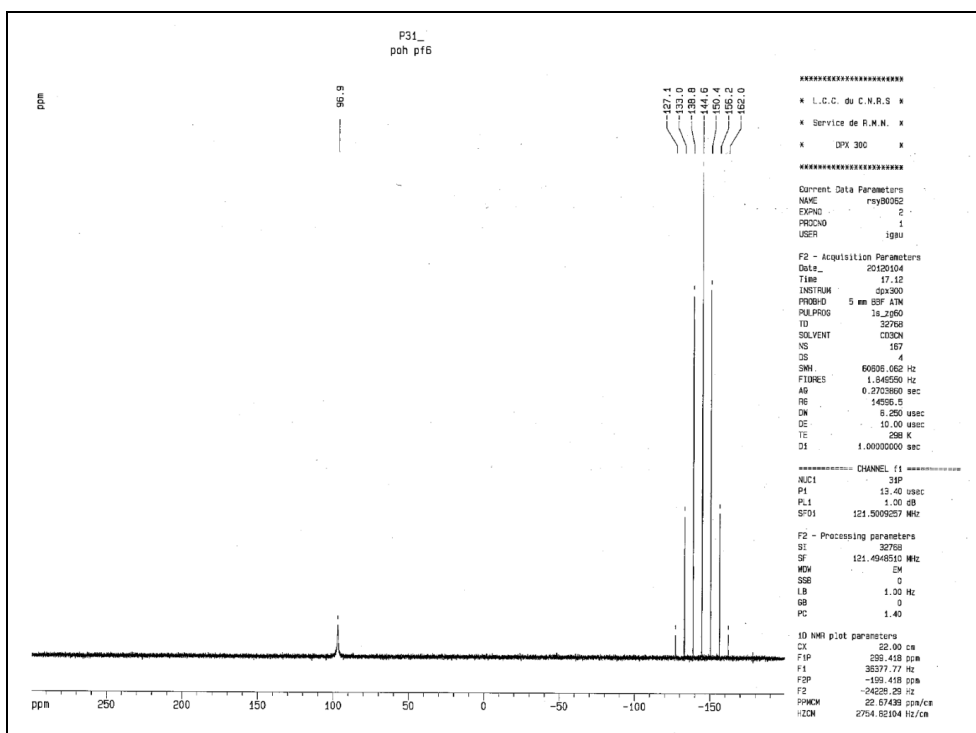

Figure S7 :  $^{31}\text{P}$  NMR spectra of complex **3** in  $\text{CD}_3\text{CN}$  at 298K.

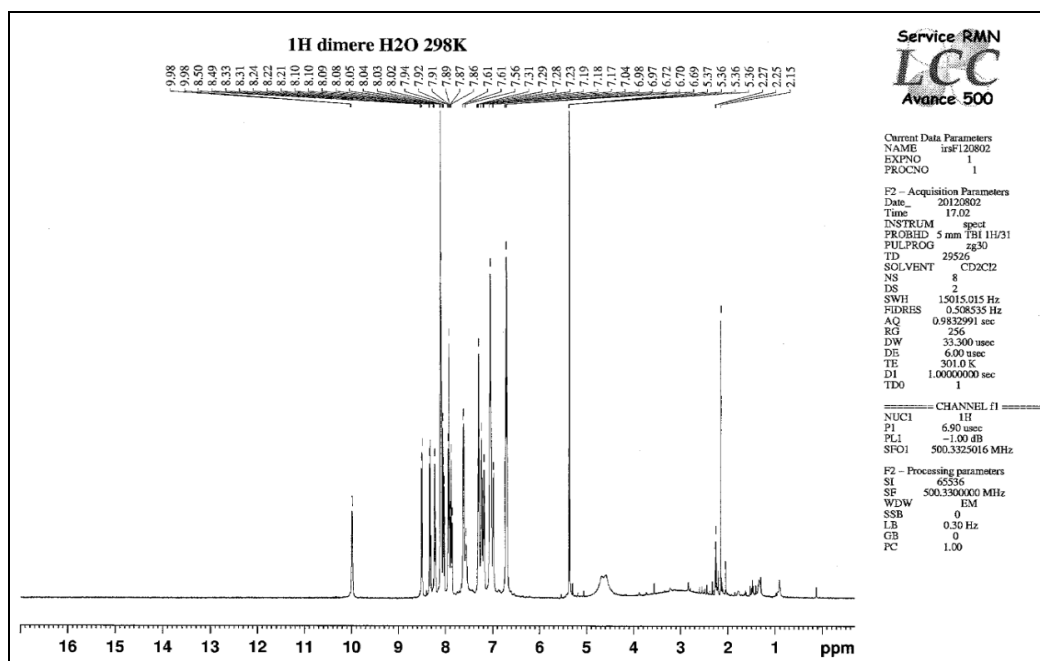

Figure S8 :  $^1\text{H}$  NMR spectra of complex **3** in  $\text{CD}_2\text{Cl}_2$  at 298K.

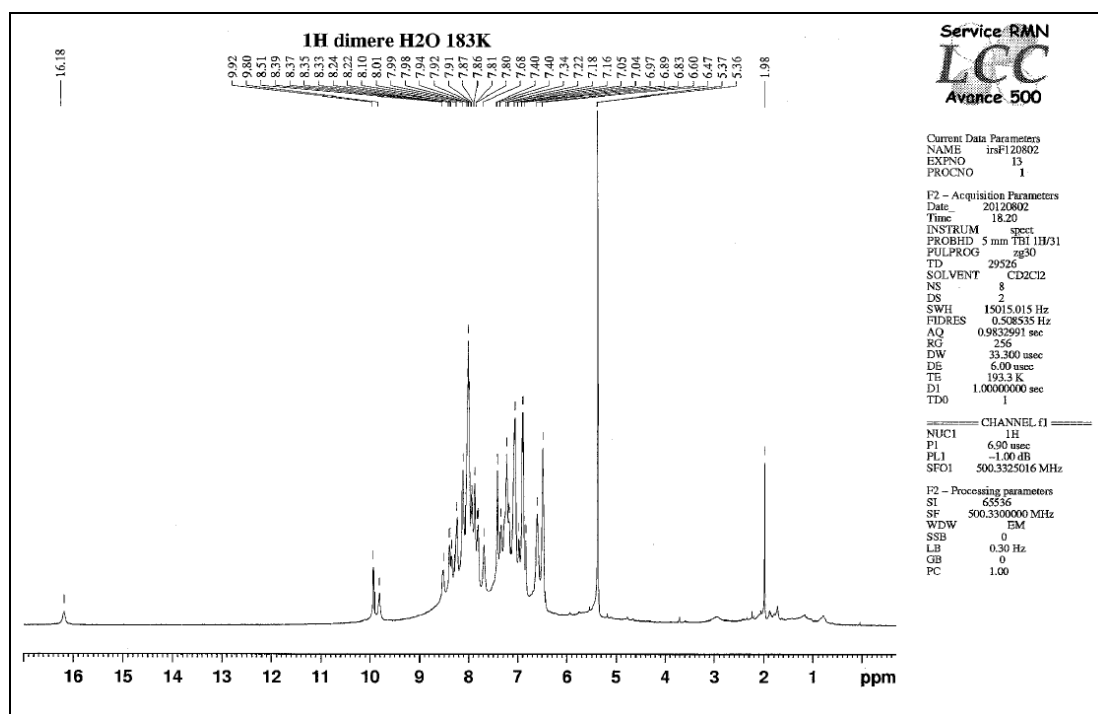

Figure S9 :  $^1\text{H}$  NMR spectra of complex **3** in  $\text{CD}_2\text{Cl}_2$  at 183K.

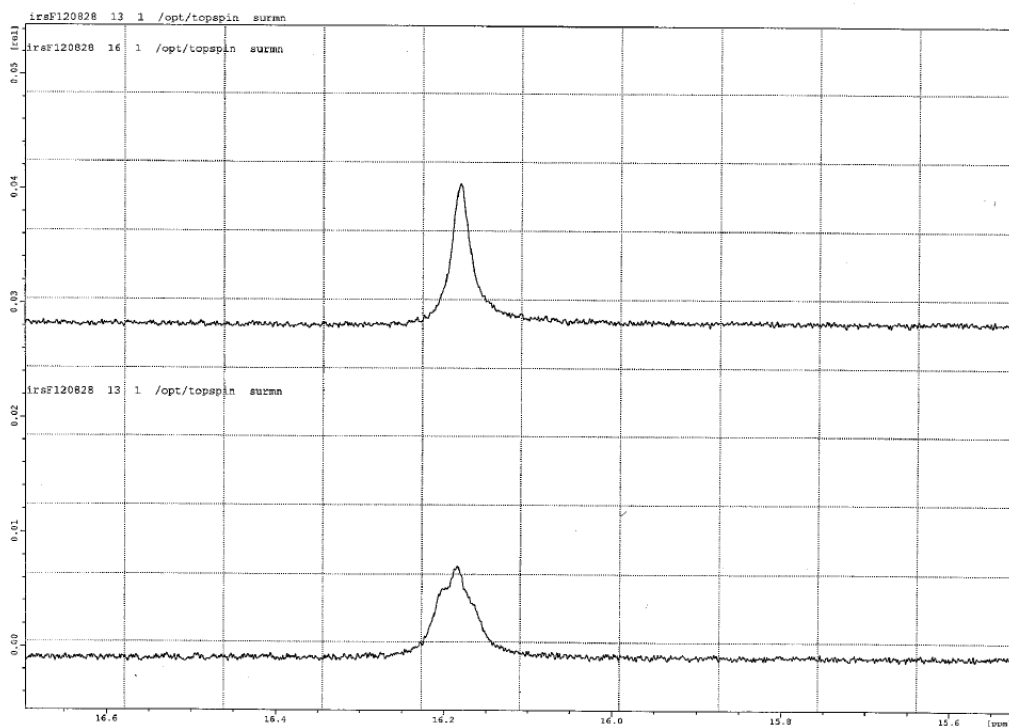

Figure S10 :  $^1\text{H}\{^{31}\text{P}\}$  (top) and  $^1\text{H}$  NMR (under) spectra of complex **3** in  $\text{CD}_2\text{Cl}_2$  at 183K.

Luminescence quantum yields have been calculated using the optically dilute method,<sup>6</sup> employing  $[\text{Ru}(\text{bpy})_3]^{2+}$  in air-equilibrated aqueous solution as quantum yield standard (0.028).<sup>7</sup> Experimental uncertainties on the absorption and photophysical data are as follows: absorption maxima, 2 nm; molar absorption, 20%; luminescence maxima, 4 nm; luminescence lifetimes, 10%; luminescence quantum yields, 20%.

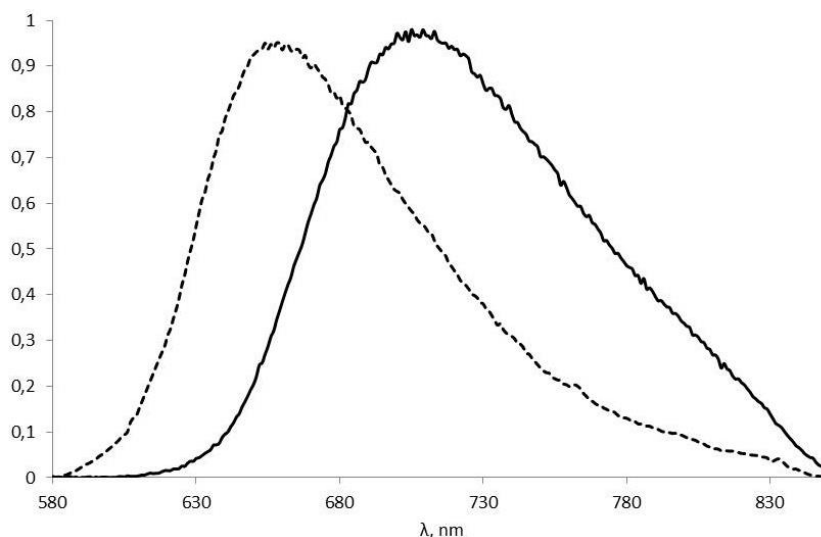

Figure S11. Luminescence spectra of **1** in acetonitrile at room temperature (solid line) and in butyronitrile at 77 K (dashed line). Spectra are normalized and uncorrected for PMT response.

Table 9. Selected photophysical data of phosphoryl complexes **1**, **2** and **3**.

|          | 298 K <sup>a</sup>                                                      |                                                |             |                            | 77 K <sup>b</sup>                              |              |
|----------|-------------------------------------------------------------------------|------------------------------------------------|-------------|----------------------------|------------------------------------------------|--------------|
|          | Absorption <sup>c</sup><br>λ, nm (ε, M <sup>-1</sup> cm <sup>-1</sup> ) | Emission <sup>d</sup><br>λ <sub>max</sub> , nm | Em<br>τ, ns | Em<br>φ(10 <sup>-4</sup> ) | Emission <sup>d</sup><br>λ <sub>max</sub> , nm | Em<br>τ (μs) |
| <b>1</b> | 480<br>(5560)                                                           | 705 (745)                                      | 55          | 8                          | 658 (685)                                      | 3.6          |
| <b>2</b> | 436<br>(11950)                                                          | <i>no detectable emission</i>                  |             |                            |                                                |              |
| <b>3</b> | 438<br>(11600)                                                          | <i>no detectable emission</i>                  |             |                            |                                                |              |

(a) Data at 298 K are in acetonitrile; (b) Emission data at 77 K are in butyronitrile; (c) Only the lowest-energy maximum is reported; (d) Corrected values in parenthesis.

## References

- <sup>1</sup> *SIR92 - A program for crystal structure solution*, A. Altomare, G. Cascarano, C. Giacovazzo and A. Guagliardi, *J. Appl. Crystallogr.*, 1993, **26**, 343.
- <sup>2</sup> *SHELX97 [Includes SHELXS97, SHELXL97, CIFTAB] - Programs for Crystal Structure Analysis (Release 97-2)*. G. M. Sheldrick, Institut für Anorganische Chemie der Universität, Tammanstrasse 4, D-3400 Göttingen, Germany, 1998.
- <sup>3</sup> *WINGX - 1.63 Integrated System of Windows Programs for the Solution, Refinement and Analysis of Single Crystal X-Ray Diffraction Data*. L. Farrugia, *J. Appl. Crystallogr.*, 1999, **32**, 837.
- <sup>4</sup> *International tables for X-Ray crystallography*, 1974, Vol. IV, Kynoch press, Birmingham, England.
- <sup>5</sup> *ORTEP3 for Windows*, L. J. Farrugia, *J. Appl. Crystallogr.*, 1997, **30**, 565.
- <sup>6</sup> J. N. Demas and G. A. Crosby, *J. Phys. Chem.*, 1971, **75**, 991.
- <sup>7</sup> N. Nakamaru, *Bull. Chem. Soc. Jpn.*, 1982 **55**, 2697.
